# 1 Transcriptome profiling of human pluripotent stem cell-derived cerebellar organoids reveals 2 faster commitment under dynamic conditions

3

4

5 Teresa P. Silva<sup>1,2</sup>, Rui Sousa-Luís<sup>2</sup>, Tiago G. Fernandes<sup>1</sup>, Evguenia P. Bekman<sup>1,2</sup>, Carlos A. V. Rodrigues<sup>1</sup>, Sandra  
6 H. Vaz<sup>2,3</sup>, Leonilde M. Moreira<sup>1</sup>, Yas Hashimura<sup>4</sup>, Sunghoon Jung<sup>4</sup>, Brian Lee<sup>4</sup>, Maria Carmo-Fonseca<sup>2</sup>, Joaquim  
7 M. S. Cabral<sup>1,\*</sup>

8

9 <sup>1</sup>iBB – Institute for Bioengineering and Biosciences and Department of Bioengineering, Instituto Superior Técnico,  
10 Universidade de Lisboa, Portugal

11 <sup>2</sup>Instituto de Medicina Molecular João Lobo Antunes, Faculdade de Medicina, Universidade de Lisboa, Portugal

12 <sup>3</sup>Instituto de Farmacologia e Neurociências, Faculdade de Medicina da Universidade de Lisboa, Portugal

13 <sup>4</sup>PBS Biotech, CA, USA

14

15

## 16 **Abstract:**

17 Human induced pluripotent stem cells (iPSCs) have great potential for disease modeling. However, generating  
18 iPSC-derived models to study brain diseases remains a challenge. In particular, the ability to recapitulate cerebellar  
19 development *in vitro* is still limited. We presented a reproducible and scalable production of cerebellar organoids  
20 by using the novel Vertical-Wheel single-use bioreactors, in which functional cerebellar neurons were obtained.  
21 Here, we evaluate the global gene expression profiles by RNA sequencing (RNA-seq) across cerebellar  
22 differentiation, demonstrating a faster cerebellar commitment in this novel dynamic differentiation protocol.  
23 Furthermore, transcriptomic profiles suggest a significant enrichment of extracellular matrix (ECM) in dynamic-  
24 derived cerebellar organoids, which can better mimic the neural microenvironment and support a consistent  
25 neuronal network. Thus, an efficient generation of organoids with cerebellar identity was achieved for the first time  
26 in a continuous process using a dynamic system without the need of organoids encapsulation in ECM-based  
27 hydrogels, allowing the possibility of large-scale production and application in high-throughput processes. The  
28 presence of factors that favors angiogenesis onset was also detected in dynamic condition, which can enhance  
29 functional maturation of cerebellar organoids. We anticipate that large-scale production of cerebellar organoids may  
30 help developing models for drug screening, toxicological tests and studying pathological pathways involved in  
31 cerebellar degeneration.

32

33 **Keywords:** organoids, human pluripotent stem cells, cerebellum, large-scale production, dynamic conditions

34

## 35 **Introduction:**

36 The human brain represents a complex structure formed by a great diversity of neurons, astrocytes,  
37 oligodendrocytes and microglia. Endogenous human brain tissue is not easily available for studying  
38 neurodevelopment and neurodegenerative diseases, and it is a subject of ethical concerns. Since the discovery of  
39 human pluripotent stem cells (PSCs), including embryonic and induced pluripotent stem cells (ESCs and iPSCs)  
40 (Takahashi et al., 2007; Thomson, 1998), distinct approaches have emerged to differentiate them into a variety of

41 glial and neuronal cell types to model human development and neurodegenerative disorders (Ishida et al., 2016;  
42 Kim et al., 2019; Liu and Zhang, 2010; Ponroy Bally et al., 2020). However, the reproducible differentiation of a  
43 desired neuronal type for disease modeling under defined conditions remains a challenge, aggravated by culture  
44 and cell line variability. Engineered 3D cultures resembling complex brain regions, usually called organoids, have  
45 been reported (Bagley et al., 2017; Lancaster et al., 2013; Matsumoto et al., 2020; Muguruma et al., 2015; Qian  
46 et al., 2018; Xiang et al., 2019). To promote PSC aggregation and generate controlled size and shape PSC aggregates,  
47 scaffold-free approaches have been used, including low-cell-adhesion 96-well culture plates (Bagley et al., 2017;  
48 Lancaster et al., 2013; Matsumoto et al., 2020; Muguruma et al., 2015; Xiang et al., 2019), conical tubes (Qian  
49 et al., 2018) or microwell culture plates (Silva et al., 2020a), which are difficult to adapt for large scale production.  
50 Furthermore, it is essential to produce organoids large enough to recapitulate tissue morphogenesis and cellular  
51 organization without the limitation of oxygen, nutrients and morphogen diffusion to the cells (McMurtrey, 2016).  
52 To help address this critical issue, cerebral organoids were already cultured in dynamic systems. Usually, reported  
53 protocols rely on the initial neural commitment of PSCs in static conditions, followed by encapsulation of the  
54 organoids in extracellular matrix (ECM)-based hydrogels and their transfer to dynamic culture conditions  
55 (Lancaster et al., 2012; Qian et al., 2018). Such approach, however, may limit the potential scale-up of organoid  
56 production, which is important for drug screening applications.

57 We described a new approach for the reproducible and scalable generation of organoids that adopt cerebellar  
58 identity and further mature into cerebellar neurons under chemically defined and feeder-free 3D dynamic  
59 conditions. Indeed, morphological structures similar to human embryonic cerebellum were firstly generated by  
60 Muguruma and colleagues in static conditions (Muguruma et al., 2015). However, these organoids only recapitulate  
61 the embryonic structure of cerebellar tissue and the differentiation of functional cerebellar neurons was only  
62 achieved in 2D culture after organoid dissociation, using either co-culturing with animal (Muguruma et al., 2015;  
63 Tao et al., 2010) and human-derived feeder cells (Wang et al., 2015), or in a co-culture free system (Silva et al.,  
64 2020a). By using the novel single-use Vertical-Wheel™ bioreactors (VWBRs, PBS Biotech), we are able to mimic  
65 later stages of human cerebellar development *in vitro*, by easily generating high numbers of human iPSC-derived  
66 aggregates and efficiently differentiating them into mature cerebellar organoids, which contain diverse types of  
67 cerebellar neurons including Purkinje cells and granule cells. VWBRs were already successfully used for human  
68 iPSC (Borys et al., 2020; Nogueira et al., 2019; Rodrigues et al., 2018) and mesenchymal stem cell expansion  
69 (Sousa et al., 2015; de Sousa Pinto et al., 2019). The VWBRs combine a large vertical impeller and a U-shaped  
70 bottom to provide a more homogeneous shear distribution inside the bioreactor, allowing a gentle and uniform  
71 mixing and particle suspension with reduced power input and agitation speeds (Croughan et al., 2016). Here,  
72 expression profiles from RNA sequencing (RNA-seq) of cerebellar organoids generated under static or dynamic  
73 conditions were evaluated, revealing a more efficient cerebellar commitment in the latter protocol. Furthermore,  
74 RNA-seq data analysis suggests a significant enrichment of ECM in dynamic conditions, avoiding the encapsulation  
75 of organoids in ECM-based hydrogels and thus facilitating the large-scale production and their applicability in high-  
76 throughput processes. The presence of a microenvironment that favors angiogenesis onset was also observed in  
77 dynamic conditions, which can support a more complex environment sustaining a functional maturation of  
78 cerebellar organoids.

79

## 80 **Materials and Methods**

81

82 **Maintenance of human iPSCs.** In this study, three distinct human iPSC lines, F002.1A.13 (Silva et al., 2020a),  
83 Gibco Human Episomal iPSC line (iPSC6.2, Thermo Fisher Scientific) (Burrige et al., 2011) and iPS-DF6-9-9T.B  
84 (WiCell Bank)(Junying et al., 2009) were used. All human iPSCs were cultured on Matrigel (Corning)-coated 6-

85 well plates with mTeSR<sup>TM</sup>1 medium (StemCell Technologies). Full-volume medium replacement with mTESR1  
86 was performed daily. Cells were passaged when the colonies covered approximately 85% of the surface area of the  
87 culture dish at a split ration of 1:3, using 0.5mM EDTA dissociation buffer (Thermo Fisher Scientific)(Beers et al.,  
88 2012). Two to three passages were performed before starting the differentiation protocol.

89  
90 **Generation, differentiation and maturation of human iPSC-derived aggregates using Vertical-Wheel**  
91 **Bioreactors.** In this work, PBS MINI 0.1 MAG VWBRs (PBS Biotech, USA) were used, which hold a maximum  
92 volume of 100mL. The working volume selected was 60mL, which allows a complete covering of the impeller  
93 wheel with culture medium. The protocols for seeding, operation of the vessel, and cerebellar differentiation of  
94 human iPSCs are described in detail elsewhere (Silva et al., 2020a; Silva et al., 2020b). Briefly, for single-cell  
95 seeding, cells grown in a culture dish were incubated with ROCK inhibitor (Y-27632, 10 $\mu$ M, StemCell  
96 Technologies) for 1 h at 37°C prior to harvesting with Accutase. Then, cells were treated with accutase (Sigma) for  
97 7 min at 37°C. After dissociation, single-cells were seeded in the bioreactor at a density of 250 000 cells/mL in  
98 60mL of mTeSR<sup>TM</sup>1 supplemented with 10 $\mu$ M Y-27632. To promote cell aggregation an agitation speed of 27 rpm  
99 was used. After 24 hours, 80% of the medium was replaced and aggregates were maintained in mTeSR<sup>TM</sup>1 without  
100 Y-27632 for another 24 hours at an agitation speed of 25 rpm. From day 2 to day 21 after seeding, gfCDM was  
101 used as basal medium for the differentiation (Muguruma et al., 2015; Silva et al., 2020a). Recombinant human basic  
102 FGF (FGF2, 50ng/ml, PeproTech) and SB431542 (10 $\mu$ M, Sigma) were added to culture on day 2. Full-volume  
103 medium replacement with gfCDM (supplemented with insulin, FGF2 and SB431542) was performed on day 5,  
104 letting the organoids settle at the bottom of the bioreactor. On day 7, the agitation speed was changed to 30 rpm,  
105 medium was fully replaced and two-thirds of initial amounts of FGF2 and SB were added. Recombinant human  
106 FGF19 (100ng/ml, PeproTech) was added to culture on day 14 post-seeding, and full-volume replacement was  
107 performed on day 18. From day 21, the aggregates were cultured in Neurobasal medium (Thermo Fisher Scientific)  
108 supplemented with GlutaMax I (Thermo Fisher Scientific), N2 supplement (Thermo Fisher Scientific), and 50U/ml  
109 penicillin/50 $\mu$ g/ml streptomycin (PS, Thermo Fisher Scientific). Full-volume replacement was performed every 7  
110 days. Recombinant human SDF1 (300ng/ml, PeproTech) was added to culture on day 28. After 35 days of  
111 differentiation, neuronal maturation was promoted by using BrainPhys Neuronal Medium (StemCell Technologies),  
112 supplemented with NeuroCult SM1 Neuronal Supplement (StemCell Technologies), N2 Supplement-A (StemCell  
113 Technologies), Recombinant Human Brain Derived Neurotrophic Factor (BDNF, PeproTech, 20ng/mL),  
114 Recombinant Human Glial-Derived Neurotrophic Factor (GDNF, PeproTech, 20ng/mL), dibutyryl cAMP (1mM,  
115 Sigma), and ascorbic acid (200nM, Sigma). One-third of total volume was replaced every 3 days.

116  
117 **Aggregate size and biomass analysis.** To monitor aggregate sizes throughout time in culture, several images were  
118 acquired at different time points using a Leica DMI 3000B microscope with a Nikon DXM 1200F digital camera.  
119 The aggregate area was measured using ImageJ Software. Considering the aggregates as spheroids, diameters were  
120 calculated based on determined area according to the equation:  $d = 2 \times \sqrt{\frac{A}{\pi}}$ , in which  $d$  represents the diameter  
121 and  $A$  represents the area. To analyze the volume of biomass, the volume was calculated based on the determined  
122 average diameter according to the equation:  $V = \frac{4}{3} \times \pi \left(\frac{d}{2}\right)^3$ . The total increase of biomass was calculated  
123 multiplying the volume of an aggregate in average by the total number of organoids and normalized to the biomass  
124 measured on day 1. The number of aggregates were manually quantified using 1mL-sample collected from the  
125 bioreactor.

126

127 **Expression profiling with RNA sequencing. 1) Sample collection and RNA extraction.** F002.1A.13 iPSC line-  
128 derived aggregates were collected at different time-points of cerebellar differentiation from VWBRs and static  
129 conditions. For RNA extraction, aggregates were dissociated with accutase at 37°C for 7 min. After enzymatic  
130 neutralization, the cell pellet was washed with phosphate buffered saline (PBS, 0.1M) and then stored at -80°C.  
131 Total RNA was extracted from samples using High Pure RNA Isolation Kit (Roche, Cat. 11828665001), according  
132 to the manufacturer instructions. **2) RNA-seq sample preparation and sequencing.** RNA libraries were prepared  
133 for sequencing using Lexogen QuantSeq 3'mRNA-Seq Library Prep Kit FWD for Illumina using standard protocols.  
134 Briefly, 500ng of total RNA were primed with the oligo dT primer containing Illumina-compatible linker sequences.  
135 After first strand synthesis, the RNA was removed, and second strand synthesized with Illumina-compatible random  
136 primers. After magnetic bead-based purification, the libraries were PCR amplified introducing the sequences  
137 required for cluster generation. Sequencing was performed using NextSeq (75 cycles protocol) platforms. Base  
138 calling of samples processed in NextSeq Sequencer was performed with the Real-Time Analysis (RTA) v2. **3)**  
139 **Transcriptome analyses.** Quality control of raw Illumina reads was performed using FastQC v0.11.5 tool.  
140 TrimGalore v0.4.4 was employed to trim read adaptors in paired-end mode, removing reads with less than 10 bases  
141 and/or low-quality ends (20 Phred score cut-off). The resultant reads were aligned against the reference human  
142 genome (GRCh38) using STAR v2.7.0 software, requiring uniquely mapped reads (--outFilterMultimapNmax 1)  
143 and minimum alignment score (--outFilterScoreMin) of 10. BAM files with aligned reads were run through  
144 featureCounts v2.2.6 (strandSpecific = 1) to produce estimated gene expression values, which were then gathered  
145 in a non-normalized count matrix. Normalization of gene's read counts comparison between static and dynamic  
146 protocols as well as different timepoints were done using DESeq2 v1.28.1 rlog function. PCA plot was performed  
147 using plotPCA function from the same package. Heatmaps were built using pheatmap package. Significant  
148 differentially expressed genes were detected with DESeq2 package and R v4.0.2. A double cut-off of 0.05 for  
149 adjusted p-value and 2 for  $|\log_2(\text{FoldChange})|$  was applied over DESeq2's own two-sided statistical test results.  
150 Gene set enrichment analyses was performed with topGO v2.40.0, which allowed to reveal the overrepresented GO  
151 terms between conditions. **4) Accession numbers.** RNA-seq data for this study are available through Gene  
152 Expression Omnibus (GEO) Accession Number GSE161549

153  
154 **Quantitative Real-time PCR (qRT-PCR).** Total RNA was extracted at different time-points of cerebellar  
155 differentiation using High Pure RNA Isolation Kit (Roche) and converted into complementary cDNA with  
156 Transcriptor High Fidelity cDNA Synthesis Kit (Roche). Gene expression was analyzed using SYBR<sup>®</sup> green  
157 chemistry (**Table 1**). All PCR reactions were run in triplicate, using the ViiA<sup>™</sup>7 RT-PCR System (Applied  
158 BioSystems). Quantification was performed by calculating the  $\Delta\text{Ct}$  value using GAPDH as a reference and results  
159 are shown as mRNA expression levels ( $2^{-\Delta\text{Ct}}$ ) relative to GAPDH.

160  
161 **Tissue preparation and Immunohistochemistry.** Aggregates were fixed in 4% paraformaldehyde (PFA, Sigma)  
162 for 45 min at 4°C followed by washing in PBS and overnight incubation in 15% (v/v) sucrose at 4°C. Aggregates  
163 were embedded in 7.5%/15% (v/v) gelatin/sucrose and frozen in isopentane at -80°C. Twelve- $\mu\text{m}$  sections were  
164 cut on a cryostat-microtome (Leica CM3050S, Leica Microsystems), collected on Superfrost<sup>™</sup> Microscope Slides  
165 (Thermo Scientific) and stored at -20°C. For immunostaining, sections were de-gelatinized for 45 min in PBS at  
166 37°C, incubated in 0.1 M Glycine (Millipore) for 10 min at room temperature (RT), permeabilized with 0.1% (v/v)  
167 Triton X-100 (Sigma) for 10 min at RT and blocked with 10% (v/v) fetal bovine serum (FBS, Gibco) in TBST (20  
168 mM Tris-HCl pH 8.0, 150 mM NaCl, 0.05 % v/v Tween-20, Sigma) for 30 min at RT. Sections were then incubated  
169 overnight at 4°C with the primary antibodies diluted in blocking solution (**Table 2**). Secondary antibodies were  
170 added to sections for 30 min (goat anti-mouse or goat anti-rabbit IgG, Alexa Fluor<sup>®</sup>-488 or -546, 1:400 v/v dilution,

171 Molecular Probes) at RT and nuclear counterstaining was performed using 4',6-diamidino-2-phenylindole (DAPI,  
172 1.5 µg/mL; Sigma). After brief drying, sections were mounted in Mowiol (Sigma). Fluorescence images were  
173 acquired with Zeiss LSM 710 Confocal Laser Point-Scanning Microscopes.

174  
175 **Single cell calcium imaging.** Functional maturation was evaluated by single cell calcium imaging (SCCI) to  
176 analyze the intracellular variations of Ca<sup>2+</sup> following stimulation with 50mM KCl and 100µM histamine (Sigma).  
177 2-5 days before evaluation, aggregates were re-plated on Glass Bottom Cell Culture Dish (Nest) previously coated  
178 with poly-L-ornithine (15µg/mL, Sigma) and laminin (20µg/mL, Sigma). At different time points of differentiation,  
179 neurons were loaded with Fura-2 AM (5 µM, in normal Krebs solution with the following composition: NaCl  
180 (132mM), KCl (4mM), MgCl<sub>2</sub> (1.4mM), CaCl<sub>2</sub> (2.5mM), D-(+)-glucose (6mM) and HEPES (10mM) - pH 7.4  
181 adjusted with NaOH - and incubated at 37°C for 45 min. Fura-2 AM loaded cells were sequentially excited both at  
182 340nm and 380nm, for 250ms at each wavelength, using an inverted microscope with epifluorescent optics and  
183 equipped with a high speed multiple excitation fluorimetric system (Lambda DG4, with a 175W Xenon arc lamp).  
184 The emission fluorescence was recorded at 510nm by a CDD camera. Cells were stimulated using 100µM histamine  
185 or high potassium Krebs solution (containing 50mM KCl, isosmotic substitution with NaCl), as reported elsewhere  
186 (Rodrigues et al., 2017; Xapelli et al., 2014).

187  
188 **Patch Electrophysiology.** For electrophysiological evaluation, 2-5 days before the analysis aggregates were gently  
189 dissociated using accutase (Sigma) and re-plated on coverslips coated with poly-L-ornithine (15µg/mL, Sigma) and  
190 Laminin (20µg/mL, Sigma). Whole cell patch-clamp recordings were obtained from generated neurons using an  
191 upright microscope (Zeiss Axioskop 2FS) equipped with differential interference contrast optics using a Zeiss  
192 AxioCam MRm camera and a 40x IR-Achroplan objective. During recordings, cells were continuously perfused  
193 with artificial cerebrospinal fluid containing: 124mM NaCl, 3mM KCl, 1.2mM NaH<sub>2</sub>PO<sub>4</sub>, 25mM NaHCO<sub>3</sub>, 2mM  
194 CaCl<sub>2</sub>, 1mM MgSO<sub>4</sub> and 10mM glucose, which was continuously gassed with 95%O<sub>2</sub>/5% CO<sub>2</sub>. Recordings were  
195 performed at room temperature in current-clamp [holding potential (V<sub>h</sub>) = -70 mV] with an Axopatch 200B (Axon  
196 Instruments) amplifier, as performed in (Felix-Oliveira et al., 2014). Briefly, patch pipettes with 4 to 7 MΩ  
197 resistance when filled with an internal solution containing: 125mM K-gluconate, 11mM KCl, 0.1mM CaCl<sub>2</sub>, 2mM  
198 MgCl<sub>2</sub>, 1mM EGTA, 10mM HEPES, 2mM MgATP, 0.3mM NaGTP, and 10mM phosphocreatine, pH 7.3, adjusted  
199 with NaOH. 280-290 mOsm were used to record action potential activity. Acquired signals were filtered using an  
200 in-built, 2-kHz, three-pole Bessel filter, and data were digitized at 5 kHz under control of the pCLAMP 10 software  
201 program. The junction potential was not compensated for, and offset potentials were nulled before gigaseal  
202 formation. The resting membrane potential was measured immediately upon establishing whole-cell configuration.  
203 Firing patterns of cerebellar neurons were determined in current-clamp mode immediately after achieving whole-  
204 cell configuration by a series of hyperpolarizing and depolarizing steps of current injection (500ms). Firing potential  
205 were also determined through the application of two depolarizing steps of current injection of 10ms, separated by  
206 80ms.

207

208

## 209 **Results**

210

### 211 **Production of size-controlled human iPSC-derived aggregates leads to an efficient neural commitment.**

212 The generation of human iPSC-derived organoids starts by cell aggregation to mimic the 3D structure and  
213 recapitulate both organization and functionality of human organs. The aggregation process is a critical step to obtain  
214 a homogeneous outcome in the efficiency of differentiation with high yield of viable organoids and increased

215 reproducibility of the protocol (Xie et al., 2017). We initiated the protocol by promoting cell aggregation using  
216 VWBRs (**Supplementary Fig. 1a**), in which single-cell seeding was performed at 250 000 cells/mL in 60 mL of  
217 medium and with an agitation speed of 27 rpm (**Fig. 1a**). After 24 hours, cells were able to efficiently aggregate  
218 (**Supplementary Fig. 1b**) and homogeneously shaped aggregates were obtained (day 1, **Fig. 1b**). Distribution of  
219 diameters showed that aggregate size continues to increase from day 1 to 5, achieving similar size between different  
220 iPSC lines. Furthermore, homogeneous size and shape aggregates were observed when differentiation was initiated  
221 at day 2 and their spheroid-like structure was maintained during this initial neural commitment and differentiation  
222 (**Fig. 1b**). Further analysis of aggregate diameters revealed that organoids were able to grow in size until day 35  
223 (**Fig. 1c**), with exception of iPSC6.2 cell line that presented no differences between day 21 and 35. A large number  
224 of iPSC-derived organoids can be generated with the bioreactor using a straightforward methodology, achieving  
225 about  $350 \pm 52$  (mean  $\pm$  SEM) aggregates/mL 24 hours after seeding. This number decreased at day 2 but remained  
226 constant until the end of the cerebellar commitment, achieving  $3201 \pm 123$  (mean  $\pm$  SEM) organoids in a VWBR  
227 with a working volume of 60 mL (**Fig. 1d** and **Supplementary Fig. 1c**). Probably, the merging of individual  
228 aggregates was promoted by the decrease in the agitation speed from 27 to 25 rpm, since biomass analysis  
229 demonstrated that the total volume of biomass increased up to ~4-fold until day 7, achieving a ~6-fold increase on  
230 day 35 of differentiation (**Fig. 1e** and **Supplementary Fig. 1d**).

231 To induce neural commitment, aggregates were cultured in neural medium supplemented with SB431542, fibroblast  
232 growth factor 2 (FGF2) and insulin, which are sufficient to promote neural differentiation with moderate  
233 caudalization of the neuroepithelium that is essential to mid-hindbrain patterning. Subsequently, fibroblast growth  
234 factor 19 (FGF19) and stromal cell-derived factor 1 (SDF1) were sequentially introduced in the culture to promote  
235 tissue polarity and generate different cerebellar progenitors. The pluripotency and self-renewal transcript *OCT4* was  
236 detected in human iPSCs on day 0 and upon neural induction its mRNA levels were down-regulated to almost  
237 undetectable levels by day 7 (**Fig. 1f**). Consistent with this significant downregulation of the pluripotency gene, the  
238 mRNA levels of *PAX6*, which is a transcription factor driving neurogenesis and important for neural stem cell  
239 proliferation (Sansom et al., 2009; Thakurela et al., 2016), significantly increased, showing that an efficient neural  
240 commitment was already reached by day 7 (**Fig. 1f**). Immunofluorescence analysis further supports that an efficient  
241 neural commitment of the iPSC-derived aggregates is achieved by day 7 of differentiation, with most of cells within  
242 the aggregates expressing the neural progenitor marker NESTIN (**Fig. 1g**). The cryosections of organoids also  
243 revealed many structures reminiscent of the neural tube, expressing the neural markers PAX6 and SOX2 (**Fig. 1g**).  
244 Furthermore, these neural tube-like structures showed apico-basal polarity with PAX6 and SOX2 co-stained  
245 progenitors found at the luminal (apical) side marked by strong expression of apical marker N-cadherin (NCAD,  
246 **Fig. 1g**).

### 247 248 **Induction of cerebellar identity in 3D dynamic culture conditions.**

249 During human development, the territory that gives rise to the cerebellum is located in one of the hindbrain  
250 segments, which comprises the most anterior zone of the hindbrain caudally to the mid-hindbrain boundary (MHB),  
251 the isthmic organizer (IsO)(Zervas et al., 2004), and is established by differential expression of several transcription  
252 factors (Watson et al., 2015). The expression levels of *OTX2* and *GBX2* transcripts (**Fig. 2a**), that define the  
253 molecular limits of MHB, were significantly upregulated by day 7, together with those of *FGF8*, *EN2* and *PAX2*,  
254 which are crucial transcription factors involved in IsO specification (Chi et al., 2003; Joyner, 1996; Martinez et al.,  
255 1999) (**Fig. 2a**). Immunostaining analysis of organoids supports the efficient self-formation of IsO tissue, staining  
256 for OTX2 and EN2 by day 14 (**Fig. 2b, i and ii**). Therefore, signals from this organizer center, including FGF8  
257 (**Fig. 2a**), were able to stimulate the generation of cerebellar territory (Sasai, 2013), supported by expression of  
258 PAX2 (**Fig. 2b, iii**), a marker for GABAergic interneuron precursors in the developing cerebellum (Maricich and

259 Herrup, 1999), and BARHL1 (**Fig. 2b, iv**), a marker for glutamatergic progenitors during cerebellar development  
260 (Li, 2004). The validation of efficient neuronal differentiation was performed by transcriptomic analysis and  
261 supported by gene ontology (GO) analysis for upregulated genes on day 14 compared with day 0 (**Supplementary**  
262 **Fig. 1e-f**). The differential expression analysis between days 14 and 0 demonstrated an enrichment of genes on day  
263 14 that are crucial for metencephalon development, the tissue that differentiates into pons and cerebellum, and  
264 further cerebellar differentiation (**Fig. 2c**), including *EN2*, *PAX2* and *BARLH1*, supporting an effective cerebellar  
265 commitment in human iPSC-derived organoids already by day 14. By day 21, human iPSC-derived organoids  
266 displayed continuous neuroepithelial layer with PAX6<sup>+</sup> neural progenitors on the surface with few TUJ1<sup>+</sup> newborn  
267 neurons within the organoid (**Fig. 2d, i**). Furthermore, consistent with cerebellar identity, BARHL1<sup>+</sup> progenitors  
268 self-organized into continuous layers (**Fig. 2d, ii**) basally located to proliferating SOX2<sup>+</sup> progenitors (**Fig. 2d, iii**).  
269 Other types of cerebellar progenitors were found by day 21. These cells were positive for OLIG2, a marker of  
270 neurogenic progenitors of Purkinje cells (Seto et al., 2014), and were dispersed within the organoids (**Fig. 2d, iv**).  
271 On day 35, after treatment with chemokine that regulates cerebellar migration (Bagri et al., 2002), SDF1, GO  
272 analysis of significantly upregulated genes (compared to day 0) revealed enrichment of neurological processes,  
273 including neuron migration and synaptic processes (**Supplementary Fig. 1g-h**), supporting the reorganization of  
274 the neuroepithelium and initiation of neuronal maturation. Human-iPSC derived organoids were polarized by day  
275 35, with staining for ZO1 (**Fig. 2e, i**), an apical marker, on the presumably apical side of the tissue. Two different  
276 structures can be observed, neural tube-like structures enclosed within the organoid with apical side towards the  
277 lumen (**Fig. 2e, i**, asterisk), and a continuous neuroepithelium that contains the apical side on the outer surface of  
278 the organoid (**Fig. 2e, i**, arrowheads), probably resulting from merging of neural tube-like structures promoted by  
279 SDF1 addition (Muguruma et al., 2015). In both cases the internal layer organization maintained the same pattern,  
280 with a layer of proliferating progenitors SOX2<sup>+</sup> (**Fig. 2e, ii**) and PAX6<sup>+</sup> always found on the apical side (**Fig. 2e,**  
281 **iii**), and TUJ1<sup>+</sup> neuronal cells disposed basally to PAX6<sup>+</sup> neural progenitors within the organoids (**Fig. 2e, iii**).  
282 Consistent with this organization, post-mitotic BARHL1<sup>+</sup> glutamatergic cerebellar progenitors were located basally  
283 within the organoid (**Fig. 2e, iv**). Other cerebellar progenitor populations were detected by day 35, including cells  
284 expressing PAX2 (**Fig. 2e, v**) and few dispersed cells expressing CORL2 (**Fig. 2e, vi**), a marker for precursors of  
285 Purkinje cells (Nakatani et al., 2014). The differential expression analysis between days 35 and 0 supported an  
286 efficient cerebellar commitment and differentiation (**Fig. 2f**), which was validated by qRT-PCR, with significant  
287 expression of transcripts encoding specific markers for different types of cerebellar progenitors (**Fig. 2g**). These  
288 markers included GABAergic cerebellar progenitors: *KIRREL2* (essential regulator of GABAergic neuron  
289 development(Mizuhara et al., 2010)), *PAX2*, *OLIG2* and *CORL2*, and glutamatergic precursors: *PAX6*, *ATOH1*  
290 (essential for genesis of granule cells (Ben-Arie et al., 1997) and *BARLH1*.

### 291 292 **Identification of different functional cerebellar neurons in dynamic culture of cerebellar organoids.**

293 Further maturation of cerebellar organoids was promoted by culturing them in BrainPhys<sup>TM</sup> medium supplemented  
294 with BDNF and GDNF. Gene expression analysis showed, by day 56, the expression of *GAD67* and *VGLUT1*  
295 transcripts (**Supplementary Fig. 2a**), which are present in GABAergic and glutamatergic neurons, respectively,  
296 and this was maintained until day 80, suggesting the presence of these two major neuronal subtypes in the organoids.  
297 Immunostaining analysis further revealed the presence of specific markers for distinct types of cerebellar neurons.  
298 The major glutamatergic cerebellar neurons, the granule cells, were detected by co-staining for PAX6 and MAP2  
299 (**Fig. 3a**). Interestingly, immunofluorescence using antibodies to PAX6, expressed early in neural progenitors and  
300 later in cerebellar granule cells (Swanson et al., 2005), and MAP2, a neuron-specific microtubule associated protein,  
301 revealed a robust organization within organoids. A dense layer of PAX6<sup>+</sup>/MAP2<sup>-</sup> precursors was detected, whereas  
302 MAP2<sup>+</sup> fibers were distinguished basally to the progenitor's layer by day 56 of differentiation (**Fig. 3a, i**), and the

303 co-localization of PAX6<sup>+</sup> cells with MAP2<sup>+</sup> neuronal network (**Fig. 3a, ii**), indicated the presence of mature granule  
304 cells. Along the maturation, the initially large PAX6<sup>+</sup> neuroepithelium became smaller while, simultaneously, the  
305 MAP2<sup>+</sup> region was extended (**Fig. 3a**). In some organoids a mature neuronal network was formed, without the  
306 presence of neural progenitors (**Fig. 3a, iv**), whereas in other cases a niche of PAX6<sup>+</sup> progenitors remained until  
307 day 80 (**Fig. 3a, v**). Also, other types of glutamatergic cerebellar cells seem to be found, including unipolar brush  
308 cells staining for TBR2 and MAP2 (**Fig. 3b**) and deep cerebellar projection neurons expressing TBR1 and MAP2  
309 (**Fig. 3c**). Purkinje cells, the class of GABAergic neurons within the cerebellum with a most elaborated dendritic  
310 arbor, expressing the calcium-binding protein calbindin (CALB), were detected within a compact meshwork along  
311 the surface of organoids (**Fig. 3d**). Some of the CALB<sup>+</sup> cells were also positive for Purkinje cell-specific glutamate  
312 receptor GRID2 (**Fig. 3e**), indicating the presence of mature Purkinje cells. Within the neuronal network, cells  
313 expressing parvalbumin (PVALB) were also found, and their non-overlapping expression with CALB identifies  
314 them as GABAergic interneurons (**Fig. 3f**). Golgi cells, another GABAergic cerebellar cell type, were also detected  
315 by staining for neurogranin (NRGN) and PAX2 (**Fig. 3g**). In agreement with immunofluorescence analysis, the  
316 quantification of transcripts encoding for markers of distinct cerebellar neurons also demonstrated their robust  
317 expression during the maturation protocol (**Fig. 3h**). Significant levels of mRNA encoding for specific markers of  
318 Purkinje cells were detected by qRT-PCR analysis (**Fig. 3i**), including *L7/PCP2* (Purkinje cell protein 2), *GRID2*,  
319 *CBLN1* (Cerebellin 1 Precursor), *LHX5* (LIM-homeodomain transcription factor) and *ALDOC* (aldolase C, a brain  
320 type isozyme of a glycolysis enzyme).

321 To evaluate the maturation in cerebellar organoids, we performed single-cell calcium imaging. For that, organoids  
322 were gently dissociated, and single cells were stimulated with 50 mM KCl and 100 μM histamine. KCl treatment  
323 leads to neuron depolarization increasing intracellular calcium concentration, whereas histamine stimulation  
324 increases calcium concentration in progenitor cells. Thus, we quantified the percentage of KCl responsive cells,  
325 presenting a histamine/KCl ratio below 0.8. Quantification of the percentage of neurons in different human iPSC  
326 lines demonstrated that this percentage varied between 37.5% and 82.4% within the organoids by day 50 (**Fig. 3j**).  
327 Nevertheless, the organoids from all cell lines presented a gradual and time-dependent neuronal differentiation,  
328 achieving 69% to 87% of neurons at the end of the differentiation protocol (**Fig. 3j**). These results were consistent  
329 with the presence of cell niches containing KI67<sup>+</sup>, SOX2<sup>+</sup> and PAX6<sup>+</sup> neural progenitors during all maturation  
330 process (**Supplementary Fig. 2b-g**), retained until day 80 of differentiation. Furthermore, the electrophysiological  
331 properties of differentiated neurons were evaluated by patch-clamp recordings after organoid dissociation and re-  
332 plating. The differentiated neurons within organoids on day 80 exhibited fire action potential after a continuous  
333 current injection (**Fig. 3l**) and were able to respond to two different current injections separated by 10ms (**Fig. 3k**),  
334 demonstrating their capability for depolarizing, repolarizing and recovering. Thus, organoids in this dynamic  
335 condition were maintained viable for up to 80 days (**Supplementary Fig. 2h**), containing different types of  
336 functional cerebellar neurons.

337  
338 **Dynamic culturing condition allows more efficient mid-hindbrain commitment and faster cerebellar**  
339 **differentiation.**

340 A robust cerebellar commitment and differentiation was previously demonstrated using a static culture system (Silva  
341 et al., 2020a). However, in static condition we found that organoids tend to coalesce starting from day 21 of  
342 differentiation, forming large macroscopic structures with a dense cell mass (**Supplementary Fig. 3a**), which might  
343 resist to diffusion of oxygen, nutrients and morphogens. Differently, in VWBRs, organoids exhibited a pronounced  
344 epithelization similar to neural tube structures with luminal space (**Supplementary Fig. 3a**). The analysis of  
345 diameter distributions revealed a more homogeneous aggregate size during cerebellar differentiation in dynamic  
346 condition when compared with static culture (**Supplementary Fig. 3b**). Likewise, at the end of cerebellar



347 commitment, much larger aggregates were present in static condition, reaching more than 1000  $\mu\text{m}$  in some cases  
348 (**Supplementary Fig. 3b**).

349 To determine the impact of dynamic culturing condition on cerebellar commitment and differentiation, a  
350 transcriptomic analysis of organoids derived from static and dynamic differentiations was performed. Principal  
351 component analysis (PCA) demonstrated considerable transcriptomic differences between organoids obtained in  
352 static and dynamic conditions at different timepoints (**Fig. 4a**). The global gene expression profiles showed a  
353 significant clustering of samples by conditions and differentiation stage, in which PC1 represents 54% of variance  
354 (**Fig. 4a**), probably related with differentiation progress, followed by 27% of variance captured by PC2 (**Fig. 4a**),  
355 suggesting differences between static and dynamic conditions. By day 14, GO analysis of significantly upregulated  
356 genes in the dynamic protocol (**Fig. 4b-c**) when compared with static conditions showed enrichment of  
357 regionalization (GO:0021871; GO:0021978) and pattern specification processes (GO:0009952, **Fig. 4c**), related  
358 with the self-organization and patterning of cells. Interestingly, midbrain development processes were enriched in  
359 dynamic conditions, confirmed by higher number of normalized read counts of transcripts of representative genes  
360 annotated in the midbrain development (**Supplementary Fig. 3c**). Nevertheless, when we evaluated the top 20  
361 genes that contributed for this difference in the normalized read counts, some of the transcripts that were upregulated  
362 in dynamic protocol by day 14 are also annotated and reported to be involved in hindbrain development (4/8 genes,  
363 **Supplementary Fig. 3d**), suggesting a possible more efficient mid-hindbrain patterning in the dynamic protocol  
364 by day 14. In addition, the analysis of transcripts annotated in cerebellar development showed a higher expression  
365 in dynamic conditions by day 14 and achieved similar levels at day 35 (**Fig. 4d**), suggesting a faster cerebellar  
366 differentiation in the dynamic protocol when compared with static. By qRT-PCR analysis, the mRNA levels of  
367 transcripts critical for cerebellar development, including *OTX2*, *EN2*, *PAX2*, *PAX6* and *KIRREL2*, and those  
368 expressed in cerebellar progenitors, such as *ATOH1*, *BARHL1*, *OLIG2* and *CORL2*, were found up-regulated in  
369 dynamic conditions (**Fig. 4e**), supporting an accelerated cerebellar commitment and further differentiation. On the  
370 other hand, by day 35 no significant differences were observed in the expression of mRNA levels for *ATOH1*,  
371 *BARHL1*, *OLIG2* and *CORL2* by qRT-PCR between different culture conditions (**Supplementary Fig. 3e**), as  
372 expected and demonstrated in **Fig. 4d**.

373  
374 **Shear forces promote a significant enrichment of extracellular matrix during cerebellar differentiation.**

375 Mechano-transduction and hemodynamic forces represent essential regulators of early differentiation events during  
376 embryonic development (Culver and Dickinson, 2010). Therefore, hydrodynamic shear induced by fluid flow may  
377 promote stem cell differentiation toward a specific germinal layer, depending on its magnitude and duration (Wolfe  
378 et al., 2012). To determine the impact of shear stress on cerebellar organoids, the transcriptome adaptations to  
379 dynamic conditions during cerebellar differentiation were analyzed. Gene set enrichment analysis (GSEA) of  
380 significantly upregulated genes (Log<sub>2</sub> FC > 2 and adjusted p-value < 0.05, **Supplementary Fig. 4a**) during  
381 cerebellar differentiation revealed enrichment in pattern specification (GO:0009952), regionalization  
382 (GO:0021978) and morphogenesis processes (GO:0048562; GO:0048646) in dynamic culture versus the static  
383 counterpart (**Fig. 5a**), as well as biological processes involved in axon guidance and neuron migration (**Fig. 5a**).  
384 Extracellular matrix (ECM) organization was detected in dynamic conditions by GSEA, supported by higher  
385 number of normalized read counts of transcripts of representative genes annotated to the ECM organization in  
386 dynamic condition by days 14 and 35 (**Supplementary Fig. 4b**). Analysis of differentially expressed transcripts  
387 responsible for ECM organization in dynamic conditions revealed high levels of the proteoglycan *ACAN* and the  
388 link protein *TNC* (**Fig. 5b**), both of which are reported to be highly expressed in the neural ECM (Soleman et al.,  
389 2013). *SULF1*, which encodes for sulfatase 1 playing an important role in the neurite outgrowth during postnatal  
390 cerebellar development (Kalus et al., 2015), was found upregulated in the dynamic protocol. *LAMA2B*, the only

391 laminin subunit identified to be enriched in the dynamic protocol (**Fig. 5b**), has been demonstrated to be needed for  
392 proper synapse assembly (Sann et al., 2008). In addition to this laminin subunit, different genes involved in integrin  
393 cell surface interactions (HSA-216083) were found enriched in dynamic culture, including *FBNI*, *ITGA2*, *ITGA8*  
394 and *ITGB5* (**Fig. 5b**). Furthermore, dynamic cultures of cerebellar organoids presented a collagen-rich ECM, with  
395 increased expression of *COL4A5*, *COL6A3* and *COL9A1* transcripts (**Fig. 5b**), involved in NCAM signaling for  
396 neurite out-growth (HSA-375165) and axon guidance (HSA-422475) processes. Genes belonging to ECM  
397 (GO:0030198; GO:0031012; **Supplementary Fig. 4c**) and extracellular region (GO:0005576) components GO  
398 terms were particularly upregulated at day 35 for dynamic conditions (**Supplementary Fig. 4c**). The presence of  
399 extracellular components was further evaluated by immunostaining on day 35, revealing the expression of  
400 LAMININ (**Fig. 5c, i**), FIBRONECTIN (**Fig. 5c, ii and iv**) and COLLAGEN I (**Fig. 5c, iii and iv**), which was  
401 maintained until the end of differentiation (**Supplementary Fig. 4d**). Furthermore, AGGRECAN (**Fig. 5c, v**) and  
402 VERSICAN (**Fig. 5c, vi**), which are heparin sulfate proteoglycans highly expressed in neural ECM (Howell and  
403 Gottschall, 2012), were also observed by immunostaining on day 35 along with SYNAPSIN (**Fig. 5c, v and vi**), a  
404 presynaptic phosphoprotein fundamental for the regulation of synaptic transmission. This demonstrates a possible  
405 connection between synaptic processes and some elements of the ECM (De Luca et al., 2020). In addition to ECM  
406 organization, cerebellar differentiation in dynamic conditions also appeared to enhance cell adhesion processes  
407 when compared with static culturing (**Fig. 5a**). The differentially expressed genes annotated in cell adhesion process  
408 that were found upregulated in dynamic culture include *ALCAM*, *BCL2*, *EPHA7*, *FLRT2*, *LAMB2*, *LRRN2*,  
409 *PLXNA4*, *RELN*, *TNC* and *UNC5D* transcripts (**Fig. 5d**), which are also involved in axon (GO:0061564) and neuron  
410 projection development (GO:0031175), supporting an efficient neuronal differentiation. Interestingly, in addition  
411 to neuronal transcripts, cell adhesion genes involved in circulatory system development (GO:0072359), including  
412 *ACVRI*, *ADAMTS9*, *ANGPT2*, *BMP2*, *BMP4*, *COL1A1*, *DSP*, *EPHA2*, *FBNI*, *FLRT2*, *FOXJ1*, *PPARA*, *CD36* (**Fig.**  
413 **5d**), and regulation of vasculature development (GO:1901342), like *ADAMTS9*, *ANGPT2*, *BMP4*, *EPHA2*, *WNT4*  
414 (**Fig. 5d**), were found differentially expressed in organoids derived from dynamic culture when compared with  
415 static. Thus, fluid flow established by agitation in the dynamic protocol may activate additional transcriptional  
416 regulation of genes involved in angiogenesis (Wolfe and Ahsan, 2013). Some significantly downregulated genes  
417 ( $\text{Log}_2 \text{FC} < -2$  and adjusted p-value  $< 0.05$ ) in dynamic culture versus the static counterpart during cerebellar  
418 differentiation were detected, however none biological processes associated with these genes were strongly  
419 enriched.

420

#### 421 **Transcriptional modulation of genes involved in angiogenic processes by dynamic condition.**

422 Neurogenesis and angiogenesis are two different processes that seem to be tightly coupled during embryonic neural  
423 development. Nascent blood vessels were reported to actively contact dividing neural stem cells and have a function  
424 in their behavior, impacting proper brain development (Di Marco et al., 2020). To further understand how culturing  
425 cerebellar organoids in dynamic condition impacts on angiogenic transcriptional profiles, we analyzed the number  
426 of normalized read counts of representative genes annotated in the sprouting angiogenesis process (GO:0002040).  
427 An increased expression of these transcripts was detected in dynamic condition by day 35 (**Fig. 6a**). Among the  
428 top 20 genes that contributed the most to the observed differences, *BMP4*, *ESM1*, *EPHA2* and *ADAMTS9* transcripts  
429 were detected at high levels in dynamic cultures by day 35 (**Supplementary Fig. 5a**). While *ESM1* and *EPHA2*  
430 are essential regulators of angiogenesis, modulating endothelial cell behavior and migration (Brantley-Sieders et  
431 al., 2004; Rocha et al., 2014), *ADAMTS9* is expressed by microvascular endothelial cells (Koo et al., 2010), being  
432 abundantly present in the central nervous system (CNS, Gottschall and Howell, 2015). The expression of these key  
433 genes was confirmed by qRT-PCR, showing a significantly higher mRNA levels in dynamic condition in  
434 comparison with static culture at day 35 of differentiation (**Fig. 6b**), which were maintained at high levels until day

435 80 in 3D cerebellar organoids when compared with day 0 (**Supplementary Fig. 5b**). The proteins encoded by these  
436 transcripts have been reported to act by binding directly to the ECM (Rocha et al., 2014). Thus, we next assessed  
437 the transcriptional modulation of ECM organization and sprouting angiogenesis processes across cerebellar  
438 differentiation using static and dynamic protocols. Interestingly, the expression variation of transcripts annotated in  
439 these two processes was very similar, with an increased expression from day 0 to 14 in both conditions (**Fig. 6c**).  
440 Thereafter, expression dropped in static conditions and increased until day 35 in the dynamic protocol (**Fig. 6c**).  
441 Immunostaining also confirmed the presence of CD31<sup>+</sup> cells among LAMININ<sup>+</sup> ECM (**Fig. 6d**), suggesting a  
442 possible interaction between ECM enrichment and angiogenesis onset. Additionally, this dynamic condition was  
443 significantly enriched for collagen trimer and blood vessel development-specific gene signature (**Supplementary**  
444 **Fig. 5c**), confirmed by staining for CD34 and COLLAGEN I (**Supplementary Fig. 5d**). Sprouting angiogenesis is  
445 reported to be usually initiated by hypoxia and afterwards the maturation and stabilization of capillaries requires  
446 ECM deposition, as well as shear stress and other mechanical signals (Chien, 2007). Therefore, we evaluated the  
447 enrichment of transcripts involved in response to mechanical stimulus (GO:0009612) and cellular response to  
448 hypoxia (GO:0071456). In contrast to cellular response to hypoxia, where no substantial differences were identified  
449 between static and dynamic condition (**Fig. 6e**), genes annotated in response to mechanical stimulus were essentially  
450 enriched in the dynamic protocol (**Fig. 6e**). Interestingly, HIF1 $\alpha$  transcriptional activation was found downregulated  
451 in the dynamic protocol in comparison with static conditions, based on top 100 genes (**Supplementary Fig. 5e**),  
452 ruling out the contribution of hypoxia to activate the angiogenic process in the dynamic system. Based on these  
453 results, the onset of angiogenesis in the dynamic condition might be triggered by two different signaling pathways,  
454 either by ECM or mechanical stimulus (**Fig. 6f**). In the CNS, angiogenesis seems to be promoted by ECM signaling  
455 supported by NRPI expression, which interacts with ABL1 and CDC42, triggering the angiogenic process in a  
456 VEGF-independent manner (Fantin et al., 2015; Raimondi et al., 2014) (**Fig. 6f**). On the other hand, shear stress  
457 was reported to stimulate the expression of VEGFR2 mediated by induction of KLF2 (de la Paz et al., 2012; Renz  
458 et al., 2015) (**Fig. 6f**). Thus, we quantified the mRNA levels of these two candidates, *NRPI* and *KLF2*, as well as  
459 *VEGFA*, to evaluate the contribution of ECM and shear stress to the increased angiogenic pathway expression  
460 observed in dynamic cerebellar organoid cultures. *NRPI* and *KLF2* transcripts show a marked increase throughout  
461 the dynamic differentiation protocol, achieving significantly higher levels in dynamic condition in comparison with  
462 static by day 35 (**Fig. 6g**). Despite significant differences in *KLF2* mRNA levels between static and dynamic  
463 protocols, no differences in the expression of *VEGF2A* mRNA was observed by day 35 (**Fig. 6g**). From day 35,  
464 while *NRPI* mRNA levels were maintained constant until the end of the cerebellar differentiation (**Fig. 6h**), *KLF2*  
465 transcript expression continued to increase significantly until day 80 (**Fig. 6h**), which was accompanied by a slight  
466 but statistically significant increase of *VEGFA* levels from day 14 until day 80 of differentiation (**Fig. 6h**).  
467 Therefore, a possible combination of ECM and mechano-transduction pathways may contribute for the onset of the  
468 angiogenic fate, which leads to a significant expression of CD31 and CD34 until day 80 of cerebellar differentiation  
469 (**Supplementary Fig. 5f-g**). Human protein-protein interactome network for genes responsible for the modulation  
470 of angiogenic processes observed during differentiation confirmed that transcripts annotated in integrin-mediated  
471 signaling and response to stress play an active role in the regulation of angiogenesis, however, they also have an  
472 important function in neuronal processes such as, for example, neuron projection morphogenesis (**Fig. 6i**).  
473 Interaction between different gene clusters demonstrated that a common activation of neuronal and angiogenic fate  
474 may be achieved throughout the cerebellar differentiation protocol, and we hypothesize that this may be important  
475 for the higher degree of neuronal differentiation observed in dynamic condition.

476

477

478

479 **Discussion**

480 We reported a dynamic culture system able to generate human iPSC-derived cerebellar organoids, which matured  
481 into functional cerebellar neurons, using the novel VWBRs. The large-scale production of cerebellar organoids  
482 represents an important advance for automated high-throughput drug screening, as well as in regenerative medicine  
483 applications for neurodegenerative diseases that affect the cerebellum. Previous studies have mainly reported the  
484 scalable differentiation of PSC into neural progenitors and functional neurons (Bardy et al., 2013; Miranda et al.,  
485 2016; Rigamonti et al., 2016), lacking the recapitulation of structural cell organization seen during human  
486 embryonic development, as well as the ability to maintain these 3D structures containing functional neurons for  
487 long periods of time.

488

489 **Dynamic condition allows a reproducible and large-scale generation of organoids.**

490 By using the VWBRs, we applied a novel mixing mechanism generated by a large vertical wheel that rotates around  
491 the horizontal axis, and allows gentle and uniform fluid mixing (Croughan et al., 2016). Therefore, we ensured that  
492 uniform exposure of neural organoids to signaling molecules was reached. Moreover, the operation time and  
493 complexity, as well as the risk of contaminations, is reduced by using these single-use vessels, which facilitate the  
494 adoption of GMP conditions (Croughan et al., 2016). With this dynamic culture system, we were able to address  
495 several critical issues. First, it allows to easily generate a high number of organoids, which is important for high-  
496 throughput applications, attaining around  $350 \pm 52$  (mean  $\pm$  SEM) aggregates/mL in the first 24 hours after iPSC  
497 seeding at 250 000 cells/mL (**Fig. 1d** and **Supplementary Fig. 1b**). Beyond that, it is important to ensure that the  
498 seeding process leads to maximum cell survival and homogeneous aggregate production, since the aggregate size  
499 has a critical role in inducing differentiation towards a specific cell lineage (Bauwens et al., 2008). Indeed, a high  
500 percentage of cell survival was observed after the single cell seeding, once  $54.1 \pm 9.3\%$ ,  $80.7 \pm 2.4\%$  and  $88.2 \pm$   
501  $11.8\%$  of live cells were able to aggregate using three independent human iPSC lines (**Supplementary Fig. 1b**).  
502 Moreover, aggregates formed in VWBRs were uniform in size and shape, achieving the optimal diameter (Miranda  
503 et al., 2015; Miranda et al., 2016; Silva et al., 2020a) to initiate neural induction at 48 hours after cell seeding (**Fig.**  
504 **1b-c**). In comparison to static condition, organoids retained a more homogeneous diameter in VWBRs during the  
505 differentiation protocol (**Supplementary Fig. 3a-b**), which is useful to reduce variability between multiple  
506 experiments.

507

508 **Cerebellar organoids differentiated in dynamic conditions recapitulate human cerebellar structure.**

509 Using size-controlled human iPSC-derived aggregates and a chemically defined medium, we were able to  
510 recapitulate sequential steps of human cerebellar development in a continuous differentiation process, starting with  
511 an efficient cerebellar commitment (**Fig. 2**), and further differentiation into different types of cerebellar neurons  
512 (**Fig. 3**). By immunostaining and gene expression analysis, we successfully and readily identified distinct types of  
513 cerebellar Glutamatergic and GABAergic neurons (**Supplementary Fig. 2a**), as seen in layers of human cerebellar  
514 cortex and in cerebellar nuclei. Specifically, the following cell types can be produced in our dynamic culture system:  
515 Granule neurons ( $Pax6^+/MAP2^+$ ), Unipolar Brush cells ( $TBR2^+/MAP2^+$ ), DCN projection neurons  
516 ( $TBR1^+/MAP2^+$ ), Purkinje cells ( $Calbindin^+/GRID2^+$ ), non-Golgi GABAergic interneurons ( $Calbindin^-$   
517  $/Parvalbumin^+$ ) and Golgi cells ( $Neurogranin^+/PAX2^+$ ) (**Fig. 3a-g**). Furthermore, calcium imaging and  
518 electrophysiological evaluation indicate that cerebellar precursors have achieved an efficient maturation in our  
519 dynamic cultures (**Fig. 3j-k**). Interestingly, in addition to the functional establishment of neuronal network  
520 connectivity, several pools of neural progenitors were maintained until day 80 in culture during the maturation  
521 process. The maintenance of a neural progenitor niche during CNS development is an important biological process  
522 achieved by the microenvironmental cues, as well as cell-cell interactions, which are capable to balance stem cell

523 quiescence with proliferation and to direct neurogenesis versus gliogenesis (Conover and Notti, 2008). Also, during  
524 cerebellar development, different niches of cerebellar progenitor cells are observed, the first in the ventricular zone  
525 and the second in the external granule layer (ten Donkelaar et al., 2003; Wingate, 2001). SOX2<sup>+</sup> progenitor niche  
526 is present in the ventricular zone, where this protein is highly expressed from gestation weeks 20 to 24, being  
527 downregulated in the developing human cerebellum, with undetectable expression by week 38 (Pibiri et al., 2016).  
528 On the other hand, an external granular layer expressing PAX6 is observed from weeks 20 to 38 of gestation (Pibiri  
529 et al., 2016). Therefore, our 3D culture system seems to recreate the *in vivo* microenvironment observed between  
530 gestation weeks 20 and 24, supported by the presence of SOX2<sup>+</sup> and PAX6<sup>+</sup> progenitor niches (**Supplementary**  
531 **Fig. 2b-f**).

532  
533 **Faster and efficient cerebellar differentiation is promoted by dynamic culture.**

534 The VWBRs allowed us to establish a scalable and efficient system for human iPSC cerebellar commitment, with  
535 a homogeneous culture environment inside the vessel and complete suspension of cell aggregates. However, despite  
536 the particularly gentle mixing mechanism of the VWBRs, in bioreactor cultures cells are exposed to hydrodynamic  
537 shear stress inherent to the suspension culture.

538 As it was already reported that shear stress is an important regulator of germinal specification (Kumar et al., 2017;  
539 Wolfe et al., 2012), we analyzed the transcriptional changes occurring during cerebellar differentiation using  
540 dynamic conditions and compared with the static control. Evaluating the transcriptomic profiles in the initial steps  
541 of cerebellar induction, we detected a more efficient mid-hindbrain commitment, as well as a faster cerebellar  
542 differentiation in dynamic conditions (**Fig. 4** and **Supplementary Fig. 3**). The initial mid-hindbrain patterning and  
543 further cerebellar induction was achieved by using moderate caudalizing factors, like FGF2 and insulin, which were  
544 reported to induce the expression of FGF8 and EN2, crucial transcription factors involved in the isthmic organizer  
545 (Chi et al., 2003; Martinez et al., 1999) and mid-hindbrain boundary maintenance (Joyner, 1996). Yoshiki Sasai  
546 proposed that this combination can efficiently promote the self-formation of isthmic organizer tissue  
547 (OTX2<sup>+</sup>/EN2<sup>+</sup>), representing a small area within the organoid (Sasai, 2013). Afterwards, the self-production of  
548 signals from this organizer center, like FGF8, stimulate the generation of cerebellar territory (Sasai, 2013). In our  
549 dynamic culture, design features of VWBRs (Croughan et al., 2016) provide efficient fluid mixing and enhanced  
550 mass transfer within the organoids, promoting a uniform diffusion of signaling molecules, either exogenously  
551 provided morphogens or endogenous signals emanating from neighboring cells. A possible explanation for  
552 enhanced cerebellar tissue patterning in dynamic conditions may be that iPSC-derived aggregates were exposed to  
553 an efficient and uniform diffusion of FGF2 signaling that could result in a larger area of isthmic organizer tissue  
554 (OTX2<sup>+</sup>/EN2<sup>+</sup>). On the other hand, the maintenance of this organizer tissue is also dependent on the self-production  
555 of FGF and WNT signaling, as well as their suppression by inhibitors, in a reaction-diffusion model (Kondo and  
556 Miura, 2010; Turing, 1952). Thus, dynamic culture conditions, with more efficient fluid mixing, can lead to uniform  
557 exposure to signaling cues and enhance the feedback loops that operate in this self-organized system.

558  
559 **Dynamic cerebellar differentiation induces ECM enrichment.**

560 In our time-course data, comparing dynamic and static conditions, we detected that significant ECM enrichment  
561 was promoted by using VWBRs for cerebellar differentiation, diverging from the transcriptomic profiles of static  
562 condition (**Fig. 5**). Indeed, ECM components are not only highly expressed within neural tissues, but also have a  
563 great impact in some aspects of neural development (Jain et al., 2020; Long and Huttner, 2019). With this significant  
564 enrichment of ECM in our dynamic cultures, we created a system that avoids the use of exogenous ECM, for  
565 instance encapsulation with Matrigel, that is commonly used to support the maintenance of brain organoids in  
566 spinner flaks (Lancaster et al., 2012; Qian et al., 2018), being a source of a significant heterogeneity between

567 organoids (Nayler et al., 2020). In our dynamic system, self-derived ECM was enriched in proteoglycans, including  
568 aggrecan and versican, as well as a link protein (tenascin C), all of which are highly expressed in neural ECM.  
569 Besides that, transcriptomic data analysis of dynamic cultures shows a significant expression of *SULF1*, which  
570 supports neurite outgrowth during cerebellar development (Kalus et al., 2015). Other ECM components involved  
571 in synaptic processes, neurite outgrowth and axon guidance were highly enriched in dynamic cultures when  
572 compared with static, sustaining an efficient neuronal differentiation. In fact, significant changes in ECM during  
573 3D differentiation when compared with 2D were already reported, using perfusion stirred-tank bioreactors for iPSC-  
574 derived neural progenitor cells (Simão et al., 2018), confirming that 3D culture associated with dynamic conditions  
575 may better mimic protein composition as well as the neural microenvironment.

### 576 577 **Angiogenic process is activated by dynamic culture in cerebellar organoids.**

578 In addition to ECM organization, the analysis of global transcriptional modulation across the differentiation protocol  
579 also exposed a significant enrichment of transcripts involved in cell adhesion processes (**Fig. 5**). As expected, most  
580 of them were involved in neuronal processes, including axon and neuron projection development. Unexpectedly,  
581 not only cell adhesion transcripts involved in neuronal development were enriched in dynamic conditions, but also  
582 regulators of circulatory system and vascular development. In fact, previous studies have already shown that shear  
583 stress employed early in ESC differentiation favored hematopoietic and endothelial fates (Wolfe and Ahsan, 2013).  
584 Besides that, the application of shear stress to endothelial cells stimulates the expression of VEGFR2, resulting in  
585 increased endothelial cell survival (dela Paz et al., 2012). This may explain the presence of transcripts associated  
586 with angiogenic fate upon mechanical stimulation. ECM plays a crucial role in the regulation of the angiogenic  
587 process, and the proangiogenic effect of some ECM molecules and fragments (Neve et al., 2014; Stupack and  
588 Cheresh, 2002), including Collagen and laminin subtypes, fibronectin and tenascin-C, have been shown.  
589 Interestingly, our transcriptomic analysis revealed that the increased expression of ECM components during  
590 cerebellar differentiation was complemented by higher expression of transcripts involved in sprouting angiogenic  
591 processes (**Fig. 6c**), which was confirmed by co-localization of ECM components and CD31<sup>+</sup>/CD34<sup>+</sup> endothelial  
592 cells (**Fig. 6d**). To investigate a possible origin of this angiogenic process in our dynamic cultures, we analyzed  
593 three different mechanisms that could activate angiogenesis: ECM signaling, response to mechanical stimulus and  
594 cellular response to hypoxia (Pugh and Ratcliffe, 2003). Hypoxia-based is unlikely, since no differences were found  
595 in the expression of transcripts involved in the cellular response to hypoxia between static and dynamic  
596 differentiations (**Fig. 6e**). Moreover, HIF1 $\alpha$  pathway transcripts were included in the top 100 genes downregulated  
597 in dynamic conditions comparatively to the static ones (**Supplementary Fig. 5e**). Therefore, two different  
598 mechanisms may be responsible for promoting the angiogenic process in our dynamic cultures: one related with  
599 ECM organization and the other with cellular response to mechanical stimulus (**Fig. 6f**). In the CNS, angiogenesis  
600 is promoted by VEGF-independent signaling, activated by the expression of NPR1 (Tata et al., 2015). NPR1,  
601 neuropilin-1, is a non-catalytic transmembrane protein, which was originally identified as an adhesion molecule in  
602 the CNS (Takagi et al., 1995) and seems to have an essential role in the vascularization of the hindbrain (Gerhardt  
603 et al., 2004). NPR1 was reported to enforce ECM signaling (Raimondi, 2014), in which the extracellular protein  
604 domain complexes with integrins, promotes the recruitment of ABL1 and enables CDC42-actin rearrangement  
605 independently of VEGF stimulation (**Fig. 6f**), promoting angiogenesis (Fantin et al., 2015; Raimondi et al., 2014).  
606 On the other hand, mechano-transduction signaling is also responsible for mediating the angiogenic process in a  
607 VEGF-dependent manner (**Fig. 6f**). KLF2 is one of many vasoactive endothelial genes that suffer transcriptional  
608 modulation during embryonic development after the establishment of fluid flow (Lee et al., 2006). Moreover, it was  
609 demonstrated that shear-stress-induced VEGF expression is mediated by KLF2 expression (dela Paz et al., 2012)  
610 and its expression mirrors the rise of fluid shear stress across development *in vivo* (Lee et al., 2006). Overexpression

611 of KLF2 was reported to promote angiogenesis through the upregulation of EGFL7 (Renz et al., 2015), which was  
612 found expressed in the vasculature (Parker et al., 2004). Thus, we analyzed the expression of these two different  
613 angiogenic inductors, NFR1 and KLF2, to unveil the contribution of ECM remodeling and mechano-transduction  
614 signaling, in addition to VEGFA, to confirm whether angiogenesis was promoted by either an independent or  
615 dependent-VEGF signaling. Our data show that a possible combination of these two different signaling pathways  
616 could contribute for the angiogenesis enhancement observed in our dynamic culture. Significant differences of  
617 *NFR1* and *KLF2* transcript expression were found between static and dynamic conditions, with higher mRNA levels  
618 presented in dynamic conditions until day 35 (**Fig. 6g**), along with a significant expression of *VEGFA* in dynamic  
619 culture-derived organoids from day 14 to 80 of differentiation (**Fig. 6h**). We hypothesize that this combined effect  
620 observed in dynamic conditions may be important for the higher degree of neuronal maturation present in our  
621 cerebellar organoids (**Fig. 6i**).

622

## 623 **Conclusion**

624 In conclusion, we have reported here the successful and efficient scalable generation of cerebellar organoids,  
625 demonstrated by the transcriptomic profile during differentiation. The transcriptomic signatures under dynamic  
626 culture conditions revealed significant ECM organization that can better mimic the neural microenvironment and  
627 maintain the organoids healthy for at least 80 days of differentiation. One current limitation for the generation of  
628 brain organoids has been the recapitulation of a complex microenvironment that involves interaction between  
629 different cell types, including vascular cells, neurons, astrocytes, oligodendrocytes and microglia. Here, we  
630 demonstrated that dynamic culture can activate signaling pathways important to induce the angiogenic process  
631 during neural commitment, introducing significant cues for the recapitulation of a more complex tissue, comprising  
632 different cell types. Additionally, this dynamic system allows increased reproducibility between experiments and  
633 the possibility of further upscaling the production of cerebellar organoids. Bioreactor technology also has the  
634 potential to allow further improvements to the system here described, namely automated monitoring and control of  
635 the culture environment (eg. pH or dissolved oxygen concentration) or the use of alternative culture medium feeding  
636 strategies such as perfusion (Kropp et al., 2016). We expect that the methodologies developed here will widen the  
637 applicability of cerebellar organoids in high-throughput screening, including drug and toxicological testing, as well  
638 as in the study of important aspects of pathological pathways involved in cerebellar dysfunction.

639

640

641

## 642 **Acknowledgments**

643 This work was supported by Fundação para a Ciência e a Tecnologia (FCT), Portugal (UIDB/04565/2020 through  
644 Programa Operacional Regional de Lisboa 2020, Project N. 007317, PD/BD/105773/2014 to T.P.S. and  
645 SFRH/BD/147906/2019 to R.S.L.), projects co-funded by FEDER (POR Lisboa 2020—Programa Operacional  
646 Regional de Lisboa PORTUGAL 2020) and FCT through grant PAC-PRECISE LISBOA-01-0145-FEDER-016394  
647 and CEREBEX Generation of Cerebellar Organoids for Ataxia Research grant LISBOA-01-0145-FEDER-029298.

648

649 **Conflict of Interest Statement:** Authors YH and SJ are employees of PBS Biotech. The author BL is CEO and co-  
650 founder of PBS Biotech, Inc. These collaborating authors participated in the development of the bioreactors used  
651 in the manuscript. This does not alter the authors' adherence to all the policies of the journal on sharing data and  
652 materials. All other authors declare no conflict of interest.

653

654

655

656 **References**

657

- 658 Bagley JA, Reumann D, Bian S, Lévi-Strauss J, Knoblich JA. 2017. Fused cerebral organoids model interactions  
659 between brain regions. *Nat. Methods* **14**:743–751.
- 660 Bagri A, Gurney T, He X, Zou Y-R, Littman DR, Tessier-Lavigne M, Pleasure SJ. 2002. The chemokine SDF1  
661 regulates migration of dentate granule cells. *Development* **129**:4249–4260.
- 662 Bardy J, Chen AK, Lim YM, Wu S, Wei S, Weiping H, Chan K, Reuveny S, Oh SKW. 2013. Microcarrier  
663 Suspension Cultures for High-Density Expansion and Differentiation of Human Pluripotent Stem Cells to  
664 Neural Progenitor Cells. *Tissue Eng. Part C Methods* **19**:166–180.  
665 <http://online.liebertpub.com/doi/abs/10.1089/ten.tec.2012.0146>.
- 666 Bauwens CL, Peerani R, Niebruegge S, Woodhouse K a., Kumacheva E, Husain M, Zandstra PW. 2008. Control  
667 of Human Embryonic Stem Cell Colony and Aggregate Size Heterogeneity Influences Differentiation  
668 Trajectories. *Stem Cells* **26**:2300–2310. <http://doi.wiley.com/10.1634/stemcells.2008-0183>.
- 669 Beers J, Gulbranson DR, George N, Siniscalchi LI, Jones J, Thomson JA, Chen G. 2012. Passaging and colony  
670 expansion of human pluripotent stem cells by enzyme-free dissociation in chemically defined culture  
671 conditions. *Nat. Protoc.*
- 672 Ben-Arie N, Bellen HJ, Armstrong DL, McCall AE, Gordadze PR, Guo Q, Matzuk MM, Zoghbi HY. 1997.  
673 *Math1* is essential for genesis of cerebellar granule neurons. *Nature* **390**:169–172.
- 674 Borys BS, So T, Colter J, Dang T, Roberts EL, Revay T, Larijani L, Krawetz R, Lewis I, Argiropoulos B,  
675 Rancourt DE, Jung S, Hashimura Y, Lee B, Kallos MS. 2020. Optimized serial expansion of human induced  
676 pluripotent stem cells using low-density inoculation to generate clinically relevant quantities in vertical-  
677 wheel bioreactors. *Stem Cells Transl. Med.*
- 678 Brantley-Sieders DM, Caughron J, Hicks D, Pozzi A, Ruiz JC, Chen J. 2004. EphA2 receptor tyrosine kinase  
679 regulates endothelial cell migration and vascular assembly through phosphoinositide 3-kinase-mediated  
680 Rac1 GTPase activation. *J. Cell Sci.*
- 681 Burridge PW, Thompson S, Millrod MA, Weinberg S, Yuan X, Peters A, Mahairaki V, Koliatsos VE, Tung L,  
682 Zambidis ET. 2011. A universal system for highly efficient cardiac differentiation of human induced  
683 pluripotent stem cells that eliminates interline variability. *PLoS One* **6**.
- 684 Chi CL, Martinez S, Wurst W, Martin GR. 2003. The isthmus organizer signal FGF8 is required for cell survival  
685 in the prospective midbrain and cerebellum. *Development* **130**:2633–44.  
686 <http://www.ncbi.nlm.nih.gov/pubmed/12736208>.
- 687 Chien S. 2007. Mechanotransduction and endothelial cell homeostasis: The wisdom of the cell. In: . *Am. J.*  
688 *Physiol. - Hear. Circ. Physiol.*
- 689 Conover JC, Notti RQ. 2008. The neural stem cell niche. *Cell Tissue Res.*
- 690 Croughan MS, Giroux D, Fang D, Lee B. 2016. Novel Single-Use Bioreactors for Scale-Up of Anchorage-  
691 Dependent Cell Manufacturing for Cell Therapies. In: . *Stem Cell Manuf.*, pp. 105–139.
- 692 Culver JC, Dickinson ME. 2010. The effects of hemodynamic force on embryonic development.  
693 *Microcirculation.*
- 694 ten Donkelaar HJ, Lammens M, Wesseling P, Thijssen HOM, Renier WO. 2003. Development and  
695 developmental disorders of the human cerebellum. *J. Neurol.* **250**:1025–36.  
696 <http://www.ncbi.nlm.nih.gov/pubmed/14504962>.
- 697 Fantin A, Lampropoulou A, Gestri G, Raimondi C, Senatore V, Zachary I, Ruhrberg C. 2015. NRP1 Regulates  
698 CDC42 Activation to Promote Filopodia Formation in Endothelial Tip Cells. *Cell Rep.*



- 699 Felix-Oliveira A, Dias RB, Colino-Oliveira M, Rombo DM, Sebastiao AM. 2014. Homeostatic plasticity induced  
700 by brief activity deprivation enhances long-term potentiation in the mature rat hippocampus. *J.*  
701 *Neurophysiol.* **112**:3012–3022. <http://jn.physiology.org/cgi/doi/10.1152/jn.00058.2014>.
- 702 Gerhardt H, Ruhrberg C, Abramsson A, Fujisawa H, Shima D, Betsholtz C. 2004. Neuropilin-1 is required for  
703 endothelial tip cell guidance in the developing central nervous system. *Dev. Dyn.*
- 704 Gottschall PE, Howell MD. 2015. ADAMTS expression and function in central nervous system injury and  
705 disorders. *Matrix Biol.*
- 706 Howell MD, Gottschall PE. 2012. Lectican proteoglycans, their cleaving metalloproteinases, and plasticity in the  
707 central nervous system extracellular microenvironment. *Neuroscience.*
- 708 Ishida Y, Kawakami H, Kitajima H, Nishiyama A, Sasai Y, Inoue H, Muguruma K. 2016. Vulnerability of  
709 Purkinje Cells Generated from Spinocerebellar Ataxia Type 6 Patient-Derived iPSCs. *Cell Rep.* **17**:1482–  
710 1490. <http://dx.doi.org/10.1016/j.celrep.2016.10.026>.
- 711 Jain D, Mattiassi S, Goh E, Yim E. 2020. Extracellular matrix and biomimetic engineering microenvironment for  
712 neuronal differentiation. *Neural Regen. Res.*
- 713 Joyner AL. 1996. Engrailed, Wnt and Pax genes regulate midbrain-hindbrain development. *Trends Genet.*
- 714 Junying Y, Kejin H, Kim SO, Shulan T, Stewart R, Slukvin II, Thomson JA. 2009. Human induced pluripotent  
715 stem cells free of vector and transgene sequences. *Science (80-. ).* **324**:797–801.
- 716 Kalus I, Rohn S, Puvirajasinghe TM, Guimond SE, Eyckerman-Kölln PJ, Ten Dam G, Van Kuppevelt TH,  
717 Turnbull JE, Dierks T. 2015. Sulf1 and Sulf2 differentially modulate heparan sulfate proteoglycan sulfation  
718 during postnatal cerebellum development: Evidence for neuroprotective and neurite outgrowth promoting  
719 functions. *PLoS One.*
- 720 Kim H, Xu R, Padmashri R, Dunaevsky A, Liu Y, Dreyfus CF, Jiang P. 2019. Pluripotent Stem Cell-Derived  
721 Cerebral Organoids Reveal Human Oligodendrogenesis with Dorsal and Ventral Origins. *Stem Cell Reports*  
722 **12**:890–905.
- 723 Kondo S, Miura T. 2010. Reaction-Diffusion Model as a Framework for Understanding Biological Pattern  
724 Formation. *Science* **329**:1616–1620.  
725 <http://www.ncbi.nlm.nih.gov/pubmed/20929839>  
726 <http://www.sciencemag.org/cgi/doi/10.1126/science.1179047>.
- 727 Koo BH, Coe DM, Dixon LJ, Somerville RPT, Nelson CM, Wang LW, Young ME, Lindner DJ, Apte SS. 2010.  
728 ADAMTS9 is a cell-autonomously acting, anti-angiogenic metalloprotease expressed by microvascular  
729 endothelial cells. *Am. J. Pathol.*
- 730 Kropp C, Kempf H, Halloin C, Robles-Diaz D, Franke A, Scheper T, Kinast K, Knorpp T, Joos TO, Haverich A,  
731 Martin U, Zweigerdt R, Olmer R. 2016. Impact of Feeding Strategies on the Scalable Expansion of Human  
732 Pluripotent Stem Cells in Single-Use Stirred Tank Bioreactors. *Stem Cells Transl. Med.* **5**:1289–1301.  
733 <http://doi.wiley.com/10.5966/sctm.2015-0253>.
- 734 Kumar A, Placone JK, Engler AJ. 2017. Understanding the extracellular forces that determine cell fate and  
735 maintenance. *Dev.*
- 736 Lancaster MA, Renner M, Martin CA, Wenzel D, Bicknell LS, Hurles ME, Homfray T, Penninger JM, Jackson  
737 AP, Knoblich JA. 2013. Cerebral organoids model human brain development and microcephaly. *Nature*  
738 **501**:373–379.
- 739 Lancaster M a, Renner M, Martin C, Wenzel D, Bicknell LS, Hurles ME, Homfray T, Penninger JM, Jackson AP,  
740 Knoblich JA, Lupski JR, Quinlan AR, Boland MJ, Leibowitz ML, Shumilina S, Pehrson SM, Baldwin KK,  
741 Hall IM, Chen Y, Guo L, Chen J, Zhao X, Zhou W, Zhang C, Wang J, Jin L, Pei D, Zhang F, Onder TT,  
742 Daley GQ, Takahashi K, Yamanaka S, Robinton D a, Cheng L, Hansen NF, Zhao L, Du Y, Zou C, Donovan  
743 FX, Chou B, Zhou G, Li S, Dowey SN, Ye Z, Chandrasekharappa SC, Yang H, Mullikin JC, Liu PP, Kim J-

- 744 E, O'Sullivan ML, Sanchez C a, Hwang M, Israel M a, Brennand K, Deerinck TJ, Goldstein LSB, Gage FH,  
745 Ellisman MH, Ghosh A, Abyzov A, Mariani J, Palejev D, Zhang Y, Haney MS, Tomasini L, Ferrandino AF,  
746 Rosenberg Belmaker L a, Szekely A, Wilson M, Kocabas A, Calixto NE, Grigorenko EL, Huttner A,  
747 Chawarska K, Weissman S, Urban AE, Gerstein M, Vaccarino FM, Steichen C, Luce E, Maluenda J, Tosca  
748 L, Moreno-Gimeno I, Desterke C, Dianat N, Goulinet-Mainot S, Awan-Toor S, Burks D, Marie J, Weber A,  
749 Tachdjian G, Melki J, Dubart-Kupperschmitt A, Nussbaum J, Minami E, Laflamme M a, Virag J a I, Ware  
750 CB, Masino A, Muskheli V, Pabon L, Reinecke H, Murry CE, Gieseck RL, Hannan NRF, Bort R, Hanley N  
751 a, Drake R a L, Cameron GWW, Wynn T a, Vallier L, Marchetto MC, Mills J a, Wang K, Paluru P, Ying L,  
752 Lu L, Galvão AM, Xu D, Yao Y, Sullivan SK, Sullivan LM, Mac H, Omari A, Jean J-C, Shen S, Gower A,  
753 Spira A, Mostoslavsky G, Kotton DN, French DL, Weiss MJ, Gadue P, Grayton HM, Fernandes C, Rujescu  
754 D, Collier D a. 2012. Cerebral organoids model human brain development and microcephaly. *Nature*  
755 **501**:373–9.  
756 <http://www.ncbi.nlm.nih.gov/pubmed/22813947>%5Cn<http://www.ncbi.nlm.nih.gov/pubmed/23940280>%5C  
757 n<http://www.ncbi.nlm.nih.gov/pubmed/22704498>%5Cn[http://www.pubmedcentral.nih.gov/articlerender.fcgi](http://www.pubmedcentral.nih.gov/articlerender.fcgi?artid=3899231&tool=pmcentrez&rendertype=abstract)  
758 ?artid=3899231&tool=pmcentrez&rendertype=abstract"%5Cn<http://www.ncbi.nlm.nih.gov/pubmed/22704498>
- 759 Lee JS, Yu Q, Shin JT, Sebzda E, Bertozzi C, Chen M, Mericko P, Stadtfeld M, Zhou D, Cheng L, Graf T,  
760 MacRae CA, Lepore JJ, Lo CW, Kahn ML. 2006. Klf2 Is an Essential Regulator of Vascular Hemodynamic  
761 Forces In Vivo. *Dev. Cell*.
- 762 Li S. 2004. Barhl1 Regulates Migration and Survival of Cerebellar Granule Cells by Controlling Expression of  
763 the Neurotrophin-3 Gene. *J. Neurosci.* **24**:3104–3114.  
764 <http://www.jneurosci.org/cgi/doi/10.1523/JNEUROSCI.4444-03.2004>.
- 765 Liu Y, Zhang SC. 2010. Human stem cells as a model of motoneuron development and diseases. In: . *Ann. N. Y.*  
766 *Acad. Sci.*, Vol. 1198, pp. 192–200.
- 767 Long KR, Huttner WB. 2019. How the extracellular matrix shapes neural development. *Open Biol.*
- 768 De Luca C, Colangelo AM, Virtuoso A, Alberghina L, Papa M. 2020. Neurons, glia, extracellular matrix and  
769 neurovascular unit: A systems biology approach to the complexity of synaptic plasticity in health and  
770 disease. *Int. J. Mol. Sci.*
- 771 Di Marco B, Crouch EE, Shah B, Duman C, Paredes MF, Ruiz de Almodovar C, Huang EJ, Alfonso J. 2020.  
772 Reciprocal Interaction between Vascular Filopodia and Neural Stem Cells Shapes Neurogenesis in the  
773 Ventral Telencephalon. *Cell Rep.*
- 774 Maricich SM, Herrup K. 1999. Pax-2 expression defines a subset of GABAergic interneurons and their precursors  
775 in the developing murine cerebellum. *J. Neurobiol.* **41**:281–294.
- 776 Martinez S, Crossley PH, Cobos I, Rubenstein JL, Martin GR. 1999. FGF8 induces formation of an ectopic  
777 isthmic organizer and isthmo-cerebellar development via a repressive effect on Otx2 expression.  
778 *Development* **126**:1189–1200.
- 779 Matsumoto R, Suga H, Aoi T, Bando H, Fukuoka H, Iguchi G, Narumi S, Hasegawa T, Muguruma K, Ogawa W,  
780 Takahashi Y. 2020. Congenital pituitary hypoplasia model demonstrates hypothalamic OTX2 regulation of  
781 pituitary progenitor cells. *J. Clin. Invest.*
- 782 McMurtrey RJ. 2016. Analytic Models of Oxygen and Nutrient Diffusion, Metabolism Dynamics, and  
783 Architecture Optimization in Three-Dimensional Tissue Constructs with Applications and Insights in  
784 Cerebral Organoids. *Tissue Eng. Part C Methods* **22**:221–249.  
785 <http://online.liebertpub.com/doi/10.1089/ten.tec.2015.0375>.
- 786 Miranda CC, Fernandes TG, Diogo MM, Cabral JMS. 2016. Scaling up a chemically-defined aggregate-based  
787 suspension culture system for neural commitment of human pluripotent stem cells. *Biotechnol. J.* **11**:1628–  
788 1638. <http://doi.wiley.com/10.1002/biot.201600446>%5Cn<http://www.ncbi.nlm.nih.gov/pubmed/27754603>.
- 789 Miranda CC, Fernandes TG, Pascoal JF, Haupt S, Brüstle O, Cabral JMS, Diogo MM. 2015. Spatial and temporal

- 790 control of cell aggregation efficiently directs human pluripotent stem cells towards neural commitment.  
791 *Biotechnol. J.* **10**:1612–1624. <http://doi.wiley.com/10.1002/biot.201400846>.
- 792 Mizuhara E, Minaki Y, Nakatani T, Kumai M, Inoue T, Muguruma K, Sasai Y, Ono Y. 2010. Purkinje cells  
793 originate from cerebellar ventricular zone progenitors positive for Neph3 and E-cadherin. *Dev. Biol.*  
794 **338**:202–214.
- 795 Muguruma K, Nishiyama A, Kawakami H, Hashimoto K, Sasai Y. 2015. Self-Organization of Polarized  
796 Cerebellar Tissue in 3D Culture of Human Pluripotent Stem Cells. *Cell Rep.* **10**:537–550.  
797 <http://linkinghub.elsevier.com/retrieve/pii/S2211124714011048>.
- 798 Nakatani T, Minaki Y, Kumai M, Nitta C, Ono Y. 2014. The c-Ski family member and transcriptional regulator  
799 Corl2/Skor2 promotes early differentiation of cerebellar Purkinje cells. *Dev. Biol.* **388**:68–80.  
800 <http://dx.doi.org/10.1016/j.ydbio.2014.01.016>.
- 801 Nayler S, Agarwal D, Curion F, Bowden R, Becker EBE. 2020. Single-cell sequencing of human iPSC-derived  
802 cerebellar organoids shows recapitulation of cerebellar development. *bioRxiv*.
- 803 Neve A, Cantatore FP, Maruotti N, Corrado A, Ribatti D. 2014. Extracellular matrix modulates angiogenesis in  
804 physiological and pathological conditions. *Biomed Res. Int.*
- 805 Nogueira DES, Rodrigues CAV, Carvalho MS, Miranda CC, Hashimura Y, Jung S, Lee B, Cabral JMS. 2019.  
806 Strategies for the expansion of human induced pluripotent stem cells as aggregates in single-use Vertical-  
807 Wheel™ bioreactors. *J. Biol. Eng.*
- 808 Parker LH, Schmidt M, Jin SW, Gray AM, Beis D, Pham T, Frantz G, Palmieri S, Hillan K, Stainier DYR, De  
809 Sauvage FJ, Ye W. 2004. The endothelial-cell-derived secreted factor Eglf7 regulates vascular tube  
810 formation. *Nature*.
- 811 dela Paz NG, Walshe TE, Leach LL, Saint-Geniez M, D'Amore PA. 2012. Role of shear-stress-induced VEGF  
812 expression in endothelial cell survival. *J. Cell Sci.*
- 813 Pibiri V, Ravarino A, Gerosa C, Pintus MC, Fanos V, Faa G. 2016. Stem/progenitor cells in the developing  
814 human cerebellum: An immunohistochemical study. *Eur. J. Histochem.* **60**:2686.  
815 <http://www.ncbi.nlm.nih.gov/pubmed/27734996>.
- 816 Ponroy Bally B, Farmer WT, Jones E V, Jessa S, Kacerovsky JB, Mayran A, Peng H, Lefebvre JL, Drouin J,  
817 Hayer A, Ernst C, Murai KK. 2020. Human iPSC-derived Down syndrome astrocytes display genome-wide  
818 perturbations in gene expression, an altered adhesion profile, and increased cellular dynamics. *Hum. Mol.*  
819 *Genet.*
- 820 Pugh CW, Ratcliffe PJ. 2003. Regulation of angiogenesis by hypoxia: Role of the HIF system. *Nat. Med.*
- 821 Qian X, Jacob F, Song MM, Nguyen HN, Song H, Ming G. 2018. Generation of human brain region-specific  
822 organoids using a miniaturized spinning bioreactor. *Nat. Protoc.* **13**:565–580.  
823 <http://www.nature.com/doi/10.1038/nprot.2017.152>.
- 824 Raimondi C. 2014. Neuropilin-1 enforces extracellular matrix signalling via ABL1 to promote angiogenesis.  
825 *Biochem. Soc. Trans.*
- 826 Raimondi C, Fantin A, Lampropoulou A, Denti L, Chikh A, Ruhrberg C. 2014. Imatinib inhibits VEGF-  
827 independent angiogenesis by targeting neuropilin 1- dependent ABL1 activation in endothelial cells. *J. Exp.*  
828 *Med.*
- 829 Renz M, Otten C, Faurobert E, Rudolph F, Zhu Y, Boulday G, Duchene J, Mickoleit M, Dietrich AC,  
830 Ramspacher C, Steed E, Manet-Dupé S, Benz A, Hassel D, Vermot J, Huisken J, Tournier-Lasserre E,  
831 Felbor U, Sure U, Albiges-Rizo C, Abdelilah-Seyfried S. 2015. Regulation of  $\beta$ 1 Integrin-Klf2-Mediated  
832 Angiogenesis by CCM Proteins. *Dev. Cell.*
- 833 Rigamonti A, Repetti GG, Sun C, Price FD, Reny DC, Rapino F, Weisinger K, Benkler C, Peterson QP, Davidow

- 834 LS, Hansson EM, Rubin LL. 2016. Large-scale production of mature neurons from human pluripotent stem  
835 cells in a three-dimensional suspension culture system. *Stem Cell Reports* **6**:993–1008.
- 836 Rocha SF, Schiller M, Jing D, Li H, Butz S, Vestweber D, Biljes D, Drexler HCA, Nieminen-Kelhä M, Vajkoczy  
837 P, Adams S, Benedito R, Adams RH. 2014. Esm1 modulates endothelial tip cell behavior and vascular  
838 permeability by enhancing VEGF bioavailability. *Circ. Res.*
- 839 Rodrigues CA, Silva TP, Nogueira DE, Fernandes TG, Hashimura Y, Wesselschmidt R, Diogo MM, Lee B,  
840 Cabral JM. 2018. Scalable culture of human induced pluripotent cells on microcarriers under xeno-free  
841 conditions using single-use vertical-wheel<sup>TM</sup> bioreactors. *J. Chem. Technol. Biotechnol.* **93**:3597–3606.
- 842 Rodrigues RS, Ribeiro FF, Ferreira F, Vaz SH, Sebastião AM, Xapelli S. 2017. Interaction between cannabinoid  
843 type 1 and type 2 receptors in the modulation of subventricular zone and dentate gyrus neurogenesis. *Front.*  
844 *Pharmacol.* **8**.
- 845 Sann SB, Xu L, Nishimune H, Sanes JR, Spitzer NC. 2008. Neurite outgrowth and in vivo sensory innervation  
846 mediated by a Ca v2.2-laminin  $\beta$ 2 stop signal. *J. Neurosci.*
- 847 Sansom SN, Griffiths DS, Faedo A, Kleinjan DJ, Ruan Y, Smith J, Van Heyningen V, Rubenstein JL, Livesey FJ.  
848 2009. The level of the transcription factor Pax6 is essential for controlling the balance between neural stem  
849 cell self-renewal and neurogenesis. *PLoS Genet.* **5**.
- 850 Sasai Y. 2013. Next-generation regenerative medicine: Organogenesis from stem cells in 3D culture. *Cell Stem*  
851 *Cell* **12**:520–530. <http://dx.doi.org/10.1016/j.stem.2013.04.009>.
- 852 Seto Y, Ishiwata S, Hoshino M. 2014. Characterization of Olig2 expression during cerebellar development. *Gene*  
853 *Expr. Patterns* **15**:1–7.
- 854 Silva TP, Bekman EP, Fernandes TG, Vaz SH, Rodrigues CA V., Diogo MM, Cabral JMS, Carmo-Fonseca M.  
855 2020a. Maturation of Human Pluripotent Stem Cell-Derived Cerebellar Neurons in the Absence of Co-  
856 culture. *Front. Bioeng. Biotechnol.* **8**.
- 857 Silva TP, Fernandes TG, Nogueira DES, Rodrigues CA V., Bekman EP, Hashimura Y, Jung S, Lee B, Carmo-  
858 Fonseca M, Cabral JMS. 2020b. Scalable Generation of Mature Cerebellar Organoids from Human  
859 Pluripotent Stem Cells and Characterization by Immunostaining. *J. Vis. Exp.*
- 860 Simão D, Silva MM, Terrasso AP, Arez F, Sousa MFQ, Mehrjardi NZ, Šarić T, Gomes-Alves P, Raimundo N,  
861 Alves PM, Brito C. 2018. Recapitulation of Human Neural Microenvironment Signatures in iPSC-Derived  
862 NPC 3D Differentiation. *Stem Cell Reports*.
- 863 Soleman S, Filippov MA, Dityatev A, Fawcett JW. 2013. Targeting the neural extracellular matrix in neurological  
864 disorders. *Neuroscience*.
- 865 Sousa MFQ, Silva MM, Giroux D, Hashimura Y, Wesselschmidt R, Lee B, Roldão A, Carrondo MJT, Alves PM,  
866 Serra M. 2015. Production of oncolytic adenovirus and human mesenchymal stem cells in a single-use,  
867 Vertical-Wheel bioreactor system: Impact of bioreactor design on performance of microcarrier-based cell  
868 culture processes. *Biotechnol. Prog.* **31**:1600–1612.
- 869 de Sousa Pinto D, Bandejas C, de Almeida Fuzeta M, Rodrigues CAV, Jung S, Hashimura Y, Tseng RJ, Milligan  
870 W, Lee B, Ferreira FC, Lobato da Silva C, Cabral JMS. 2019. Scalable Manufacturing of Human  
871 Mesenchymal Stromal Cells in the Vertical-Wheel Bioreactor System: An Experimental and Economic  
872 Approach. *Biotechnol. J.*
- 873 Stupack DG, Cheresh DA. 2002. ECM Remodeling Regulates Angiogenesis: Endothelial Integrins Look for New  
874 Ligands. *Sci. Signal*.
- 875 Swanson DJ, Tong Y, Goldowitz D. 2005. Disruption of cerebellar granule cell development in the Pax6 mutant,  
876 Sey mouse. *Dev. Brain Res.* **160**:176–193.
- 877 Takagi S, Kasuya Y, Shimizu M, Matsuura T, Tsuboi M, Kawakami A, Fujisawa H. 1995. Expression of a cell

- 878 adhesion molecule, neuropilin, in the developing chick nervous system. *Dev. Biol.*
- 879 Takahashi K, Tanabe K, Ohnuki M, Narita M, Ichisaka T, Tomoda K, Yamanaka S. 2007. Induction of  
880 Pluripotent Stem Cells from Adult Human Fibroblasts by Defined Factors. *Cell* **131**:861–872.
- 881 Tao O, Shimazaki T, Okada Y, Naka H, Kohda K, Yuzaki M, Mizusawa H, Okano H. 2010. Efficient generation  
882 of mature cerebellar Purkinje cells from mouse embryonic stem cells. *J. Neurosci. Res.* **88**:234–247.
- 883 Tata M, Ruhrberg C, Fantin A. 2015. Vascularisation of the central nervous system. *Mech. Dev.*
- 884 Thakurela S, Tiwari N, Schick S, Garding A, Ivanek R, Berninger B, Tiwari VK. 2016. Mapping gene regulatory  
885 circuitry of Pax6 during neurogenesis. *Cell Discov.* **2**.
- 886 Thomson JA. 1998. Embryonic Stem Cell Lines Derived from Human Blastocysts. *Science (80-. )*. **282**:1145–  
887 1147. <http://www.sciencemag.org/cgi/doi/10.1126/science.282.5391.1145>.
- 888 Turing AM. 1952. The Chemical Basis of Morphogenesis. *Society* **237**:37–72.  
889 <http://rstb.royalsocietypublishing.org/content/237/641/37.short>.
- 890 Wang S, Wang B, Pan N, Fu L, Wang C, Song G, An J, Liu Z, Zhu W, Guan Y, Xu Z-QD, Chan P, Chen Z,  
891 Zhang YA. 2015. Differentiation of human induced pluripotent stem cells to mature functional Purkinje  
892 neurons. *Sci. Rep.* **5**:9232. <http://www.nature.com/srep/2015/150318/srep09232/full/srep09232.html>.
- 893 Watson LM, Wong MMK, Becker EBE. 2015. Induced pluripotent stem cell technology for modelling and  
894 therapy of cerebellar ataxia 3.
- 895 Wingate RJT. 2001. The rhombic lip and early cerebellar development. *Curr. Opin. Neurobiol.*
- 896 Wolfe RP, Ahsan T. 2013. Shear stress during early embryonic stem cell differentiation promotes hematopoietic  
897 and endothelial phenotypes. *Biotechnol. Bioeng.*
- 898 Wolfe RP, Leleux J, Nerem RM, Ahsan T. 2012. Effects of shear stress on germ lineage specification of  
899 embryonic stem cells. *Integr. Biol. (United Kingdom)*.
- 900 Xapelli S, Agasse F, Grade S, Bernardino L, Ribeiro FF, Schitine CS, Heimann AS, Ferro ES, Sebastião AM, De  
901 RA, Reis M, Malva JO, Gonzalez-Perez O. 2014. Modulation of subventricular zone oligodendrogenesis: a  
902 role for hemopressin? *Front. Cell. Neurosci.* **8**:1–9.
- 903 Xiang Y, Tanaka Y, Cakir B, Patterson B, Kim KY, Sun P, Kang YJ, Zhong M, Liu X, Patra P, Lee SH,  
904 Weissman SM, Park IH. 2019. hESC-Derived Thalamic Organoids Form Reciprocal Projections When  
905 Fused with Cortical Organoids. *Cell Stem Cell* **24**:487-497.e7.
- 906 Xie AW, Binder BYK, Khalil AS, Schmitt SK, Johnson HJ, Zacharias NA, Murphy WL. 2017. Controlled Self-  
907 assembly of Stem Cell Aggregates Instructs Pluripotency and Lineage Bias. *Sci. Rep.* **7**:14070.  
908 <http://www.nature.com/articles/s41598-017-14325-9>.
- 909 Zervas M, Millet S, Ahn S, Joyner AL. 2004. Cell behaviors and genetic lineages of the mesencephalon and  
910 rhombomere 1. *Neuron* **43**:345–357.

911

912

913

914

915

916

917

918

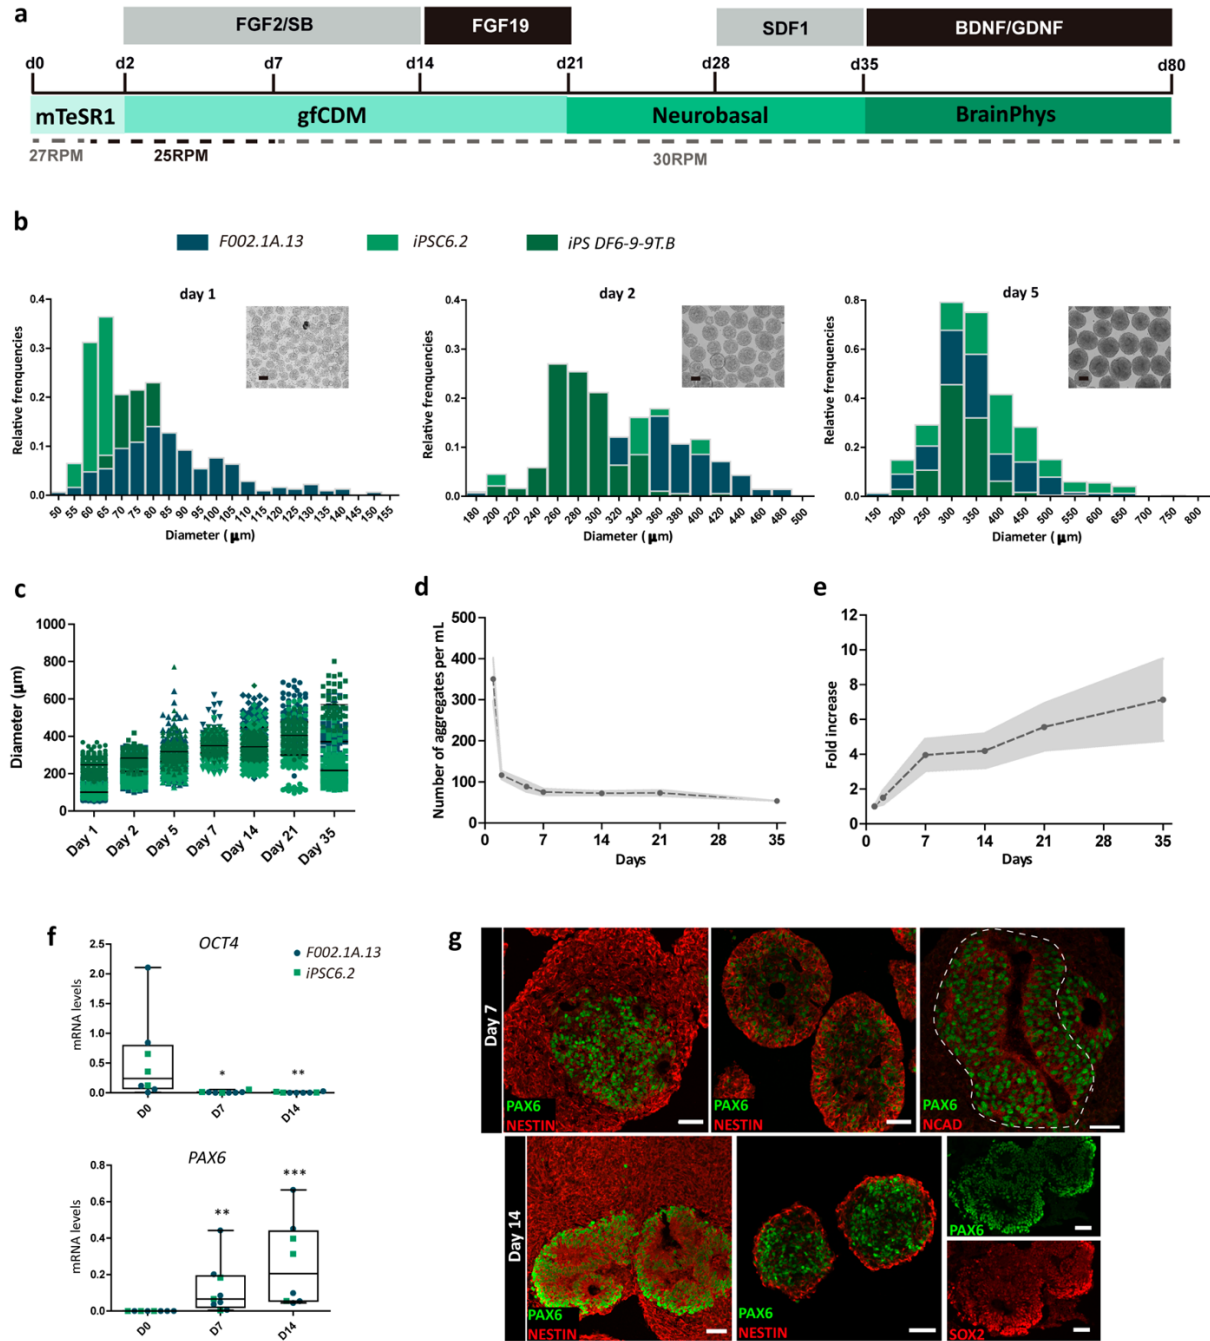

919  
920  
921  
922  
923  
924  
925  
926  
927  
928  
929  
930  
931

**Figure 1. Neural commitment in human iPSC-derived aggregates using VWBRs.** **a**, Schematic for cerebellar differentiation of human iPSC-derived aggregates using VWBR (see also Methods for details). **b**, Distribution of floating aggregates diameters and representative bright field photomicrographs at days 1, 2 and 5 of differentiation, demonstrating that homogeneous size and shape aggregates were obtained from different human iPSC lines using VWBRs. **c**, Diameter of iPSC-derived aggregates along the cerebellar differentiation using different human iPSC lines. **d**, Number of iPSC-derived aggregates from day 1 to day 35 of cerebellar differentiation. Points show the mean of 3 independent differentiation experiments using 3 different iPSC lines and the area fill represents SEM (see also Supplementary Fig. 1 for more details). **e**, Total volume of biomass relative to day 1. Points show the mean of 3 independent differentiation experiments using 3 different iPSC lines and the area fill represents SEM (see also Supplementary Fig. 1 for more details). **f**, qRT-PCR analyses of aggregates derived from different iPSC lines at the indicated time-points. Box-plots diagrams depict mRNA expression levels ( $2^{-\Delta CT}$ ) relative to *GAPDH*. Each color and shape-coded dot represents data from one experiment. One-way ANOVA (Kruskal-Wallis test), \* $p < 0.05$ , \*\* $p < 0.01$ , \*\*\* $p < 0.001$ ; error bars represent SEM. **g**, Immunofluorescence for NESTIN, PAX6, NCAD and SOX2 on days 7 and 14 of differentiation. Scale bars, 50 $\mu$ m.

932

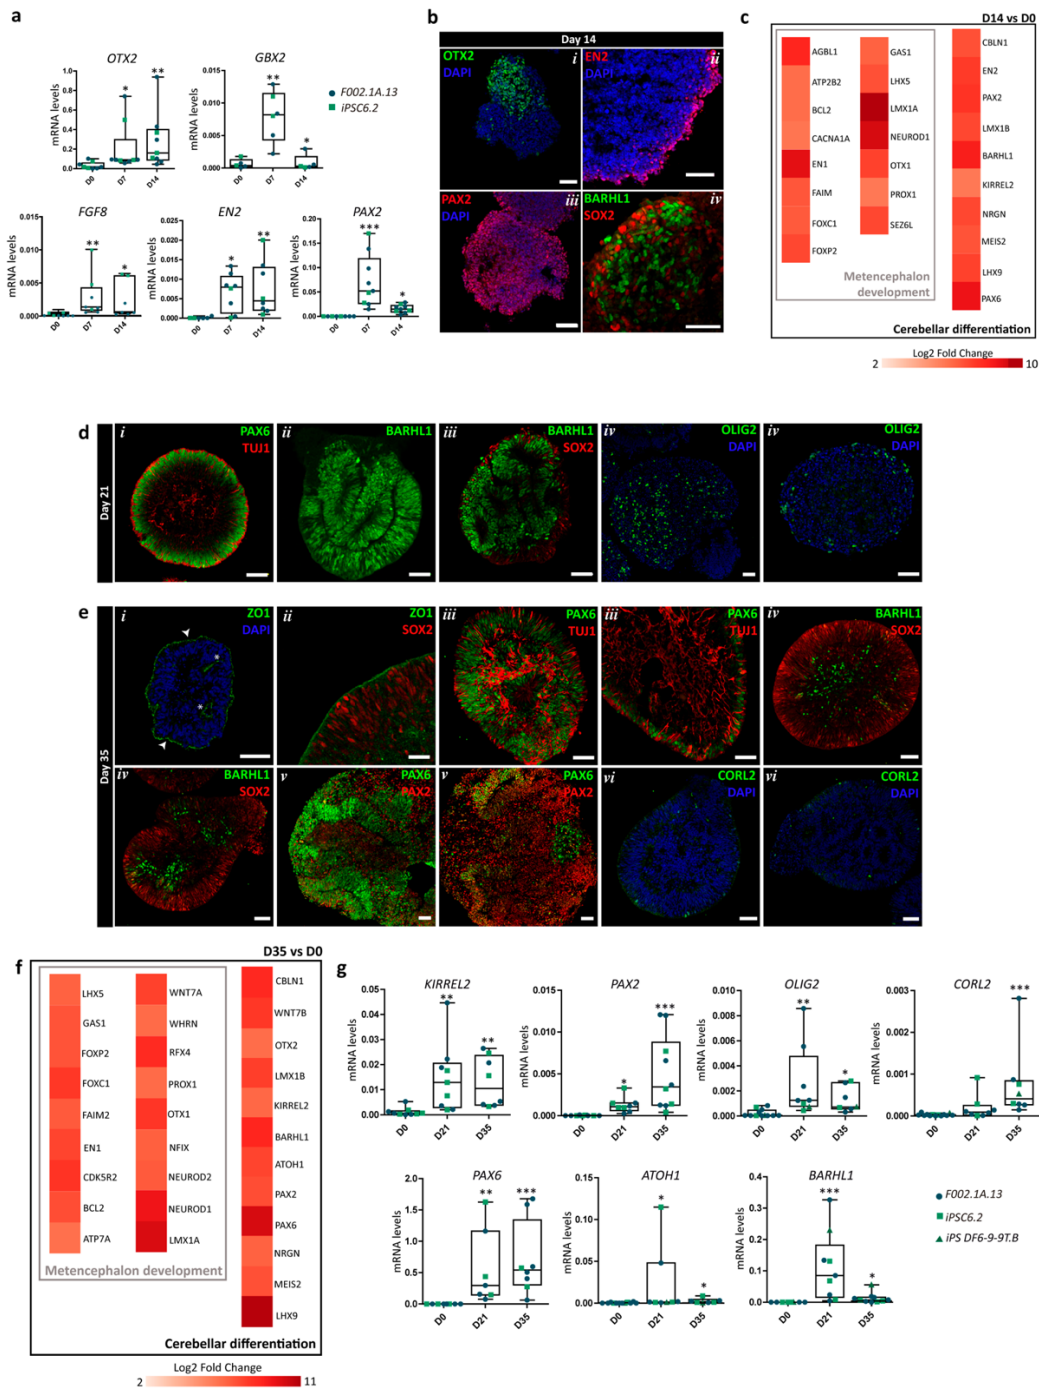

933  
934  
935  
936  
937  
938  
939  
940  
941  
942  
943  
944

**Figure 2. Efficient cerebellar commitment and differentiation in human iPSC-derived aggregates using VWBRs.** **a**, qRT-PCR analysis of aggregates derived from different human iPSC lines at the indicated time-points. Box-plots diagrams depict mRNA expression levels ( $2^{-\Delta CT}$ ) relative to *GAPDH*. Each color and shape-coded dot represents data from one differentiation experiment. One-way ANOVA (Kruskal-Wallis test), \* $p < 0.05$ , \*\* $p < 0.01$ , \*\*\* $p < 0.001$ ; error bars represent SEM. **b**, Immunofluorescence analysis on day 14 of differentiation for OTX2, EN2, PAX2, BARHL1 and SOX2. Scale bars, 50 $\mu$ m. **c**, Heatmap highlighting genes differentially expressed (Log<sub>2</sub> FC > 2 and adjusted p-value < 0.05) related with metencephalon development and cerebellar differentiation for day 14 vs day 0 of differentiation. **d** and **e**, Immunostaining analysis on days 21 and 35 of differentiation for the indicated markers. Scale bars, 50 $\mu$ m. **f**, Heatmap highlighting genes differentially expressed (Log<sub>2</sub> FC > 2 and adjusted p-value < 0.05) related with metencephalon development and cerebellar differentiation for day 35 vs day 0 of differentiation. **g**, qRT-PCR analysis of 3D cultures derived from different human iPSC lines at the indicated time-points. Box-plots diagrams depict mRNA expression levels ( $2^{-\Delta CT}$ ) relative to *GAPDH*. Each color and shape-coded dot represents data from one differentiation experiment. One-way ANOVA (Kruskal-Wallis test), \* $p < 0.05$ , \*\* $p < 0.01$ , \*\*\* $p < 0.001$ ; error bars represent SEM.

945

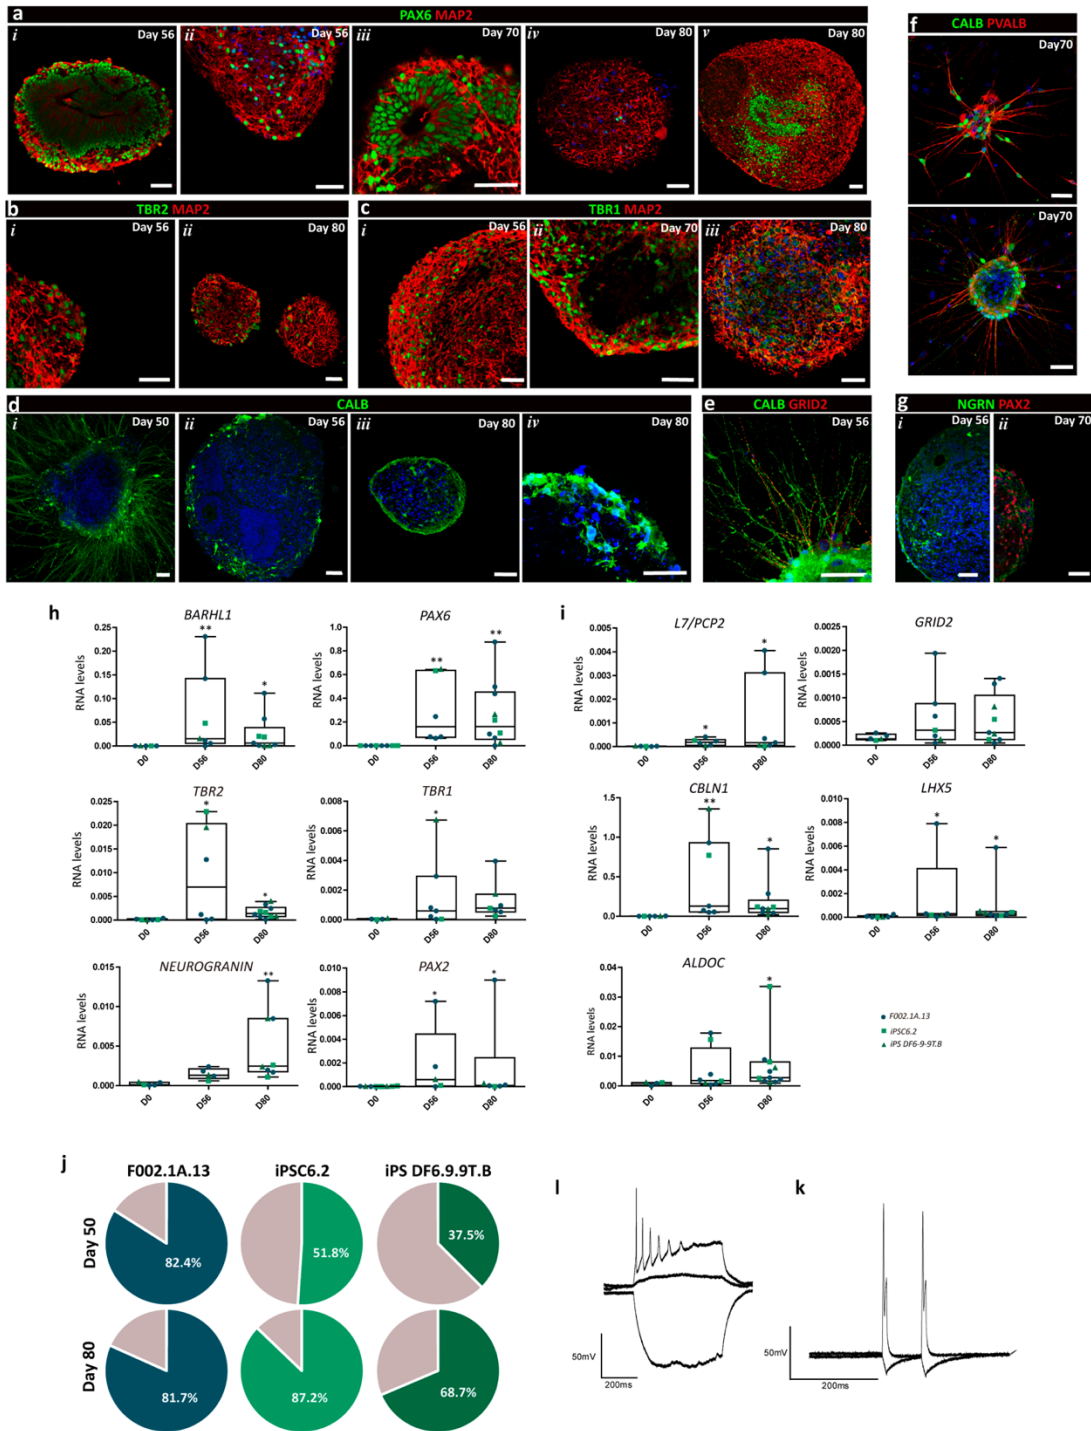

946  
947  
948  
949  
950  
951  
952  
953  
954  
955

**Figure 3. Different types of functional cerebellar neurons in human iPSC-derived aggregates.** **a-g**, Immunofluorescence of distinct proteins (as indicated at the bottom of each image) on indicated time-points of differentiation. Scale bars, 50 $\mu$ m. **h-i**, qRT-PCR analysis of aggregates derived from different human iPSC lines at the indicated time-points for markers of different types of cerebellar neurons, including Purkinje cell markers (i). Box-plots diagrams depict mRNA expression levels ( $2^{-\Delta CT}$ ) relative to *GAPDH*. Each color and shape-coded dot represents data from one differentiation experiment. One-way ANOVA (Kruskal-Wallis test), \* $p < 0.05$ , \*\* $p < 0.01$ , \*\*\* $p < 0.001$ ; error bars represent SEM. **j**, Percentage of neurons, displaying a histamine/KCl response ratio below 0.8, is shown in colored slices. **l-k**, Whole path-clamp recording on day 80 of differentiation. Representative traces of firing response evoked by a 500 ms current pulse (l) and firing responses to two independent current injections (10 ms) separated by 80 ms (k).



956  
957

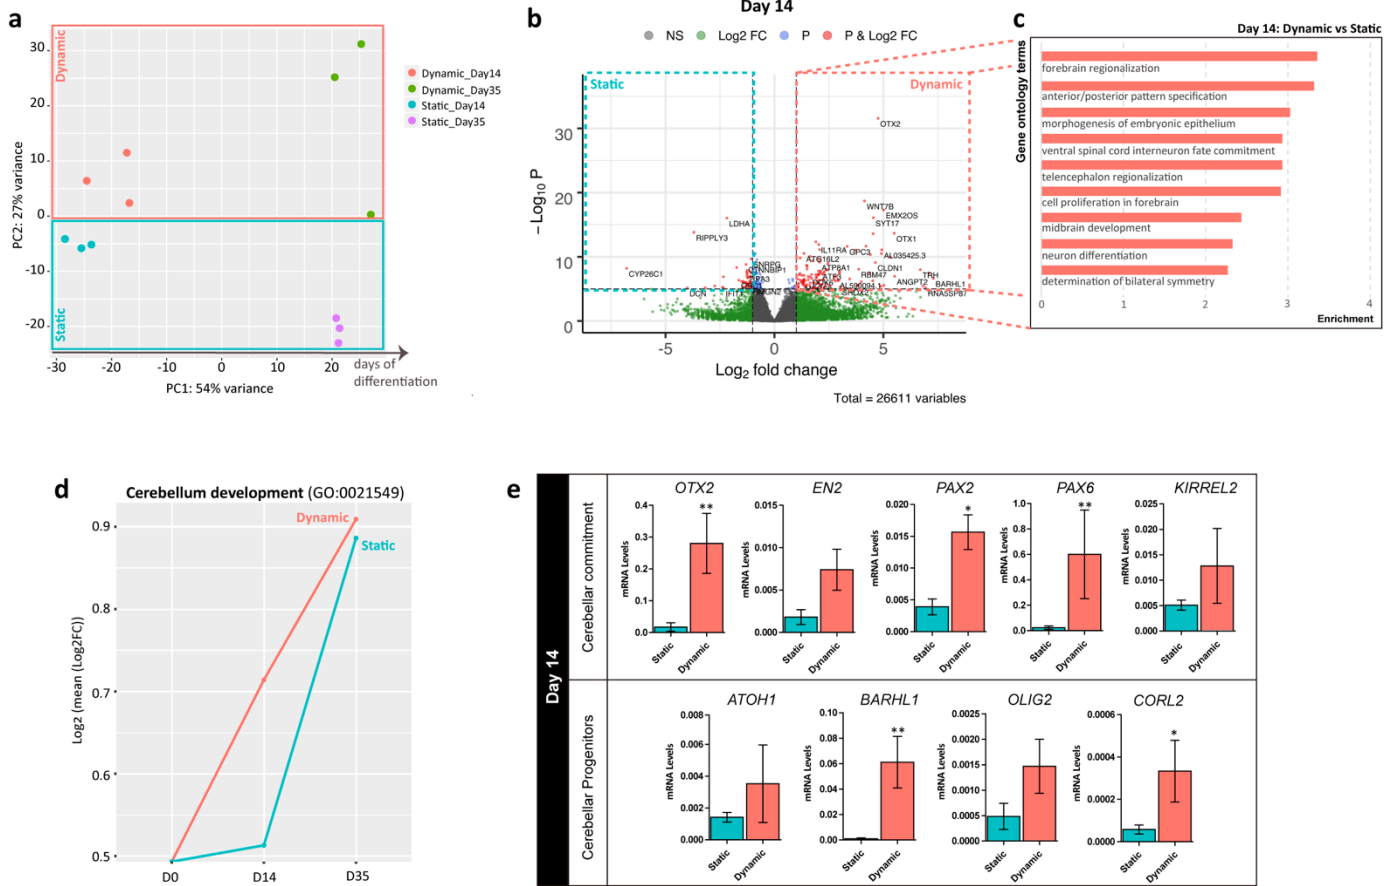

**Figure 4. Transcriptomic profiles reveal a more efficient midbrain commitment and accelerated cerebellar differentiation of human iPSCs in the dynamic condition.** **a**, PCA based on whole transcriptome data of aggregates cultured in static or dynamic condition at days 14 and 35 of cerebellar differentiation (n=3 for each condition). **b**, Volcano plot of genes identified after cerebellar differentiation of human iPSCs on day 14, comparing static and dynamic conditions. Significantly enriched genes in each condition are labeled. **c**, Top gene ontology (GO) biological processes terms identified for the differentially up-regulated genes (Log<sub>2</sub> FC > 2 and adjusted p-value < 0.05) of dynamic versus static condition at day 14 of differentiation. **d**, Line plot summarizing the expression of representative genes annotated in cerebellar development (GO:0021549) relative to day 0 along the differentiation protocol. N=111 genes **e**, qRT-PCR analyses of aggregates derived from F002.1A.13 iPSC line at day 14 of differentiation. Diagrams depict mRNA expression levels ( $2^{-\Delta CT}$ ) relative to *GAPDH* based on five independent differentiation experiments for each condition. Mann-Whitney test; \*p<0.05, \*\*p<0.01; error bars represent SEM.

958  
959  
960  
961  
962  
963  
964  
965  
966  
967  
968  
969  
970  
971  
972  
973  
974  
975  
976  
977  
978  
979

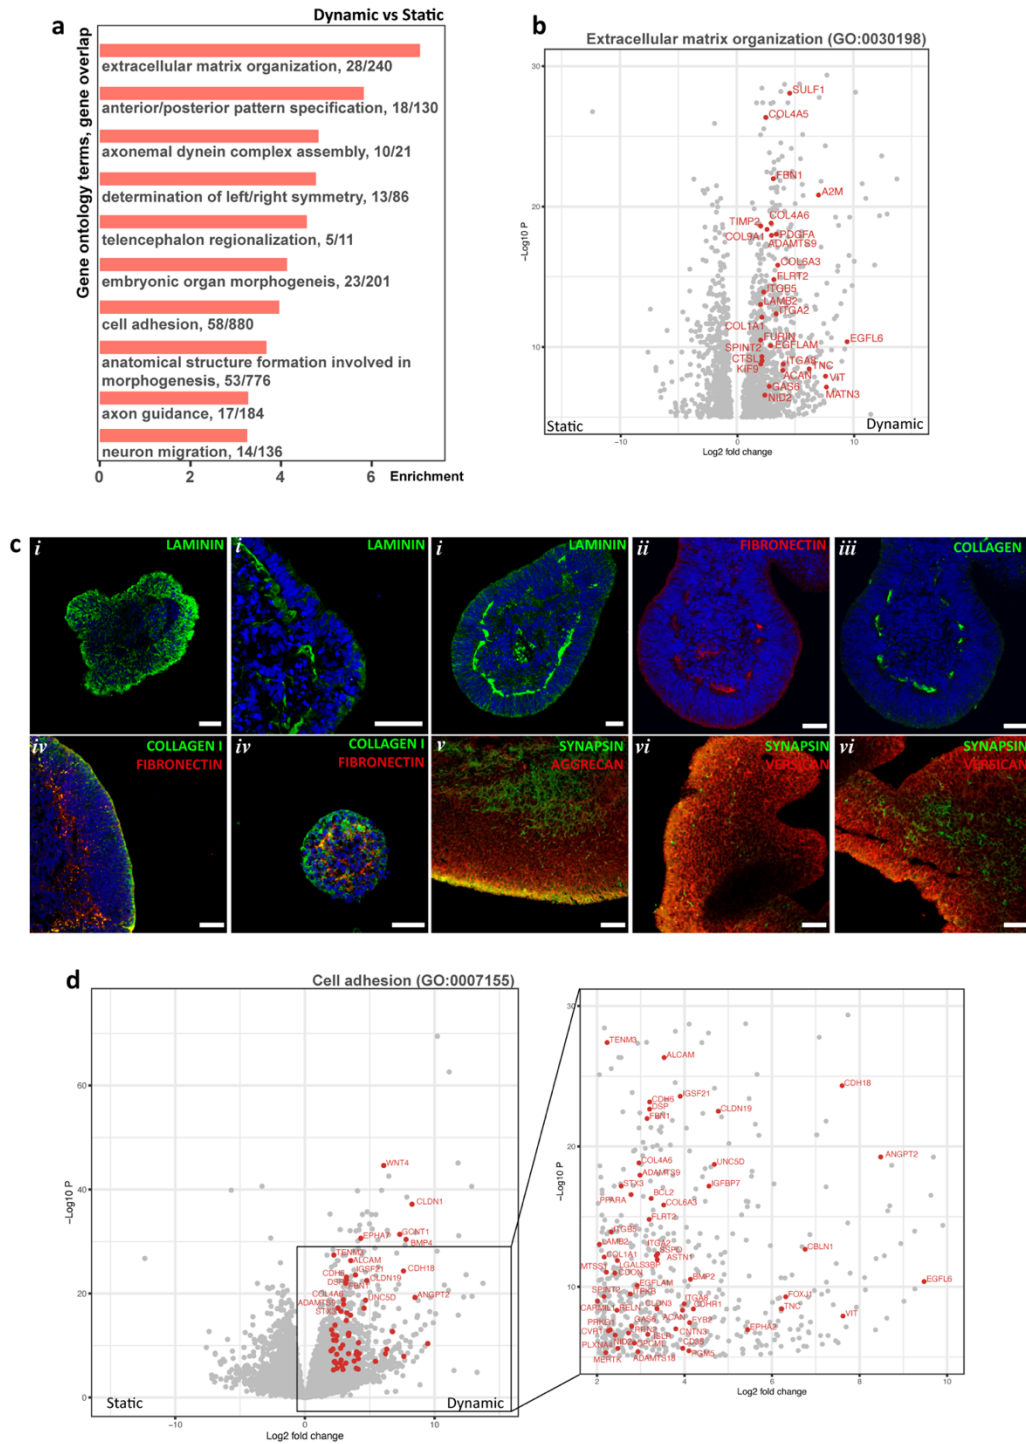

980  
981  
982  
983  
984  
985  
986  
987  
988  
989

**Figure 5. Global comparison of organoids transcriptome reveals a significant remodeling of extracellular matrix (ECM) in dynamic conditions when compared with static protocol.** **a**, Top gene ontology (GO) biological processes terms identified for the differentially up-regulated genes ( $\text{Log}_2 \text{FC} > 2$  and adjusted  $p$ -value  $< 0.05$ ) of dynamic versus static conditions in cerebellar differentiation. **b**, Volcano Plot of differentially expressed genes between dynamic and static conditions showing significantly up-regulated transcripts in dynamic conditions ( $\text{Log}_2 \text{FC} > 2$  and adjusted  $p$ -value  $< 0.05$ ) annotated in the ECM organization process (GO:0030198). **c**, Immunostaining analysis on days 35 of differentiation in dynamic conditions for the indicated ECM markers. Scale bars, 50µm. **d**, Volcano Plot of differentially expressed genes between dynamic and static conditions showing significantly up-regulated genes in dynamic conditions ( $\text{Log}_2 \text{FC} > 2$  and adjusted  $p$ -value  $< 0.05$ ) annotated in the cell adhesion process (GO:0007155).

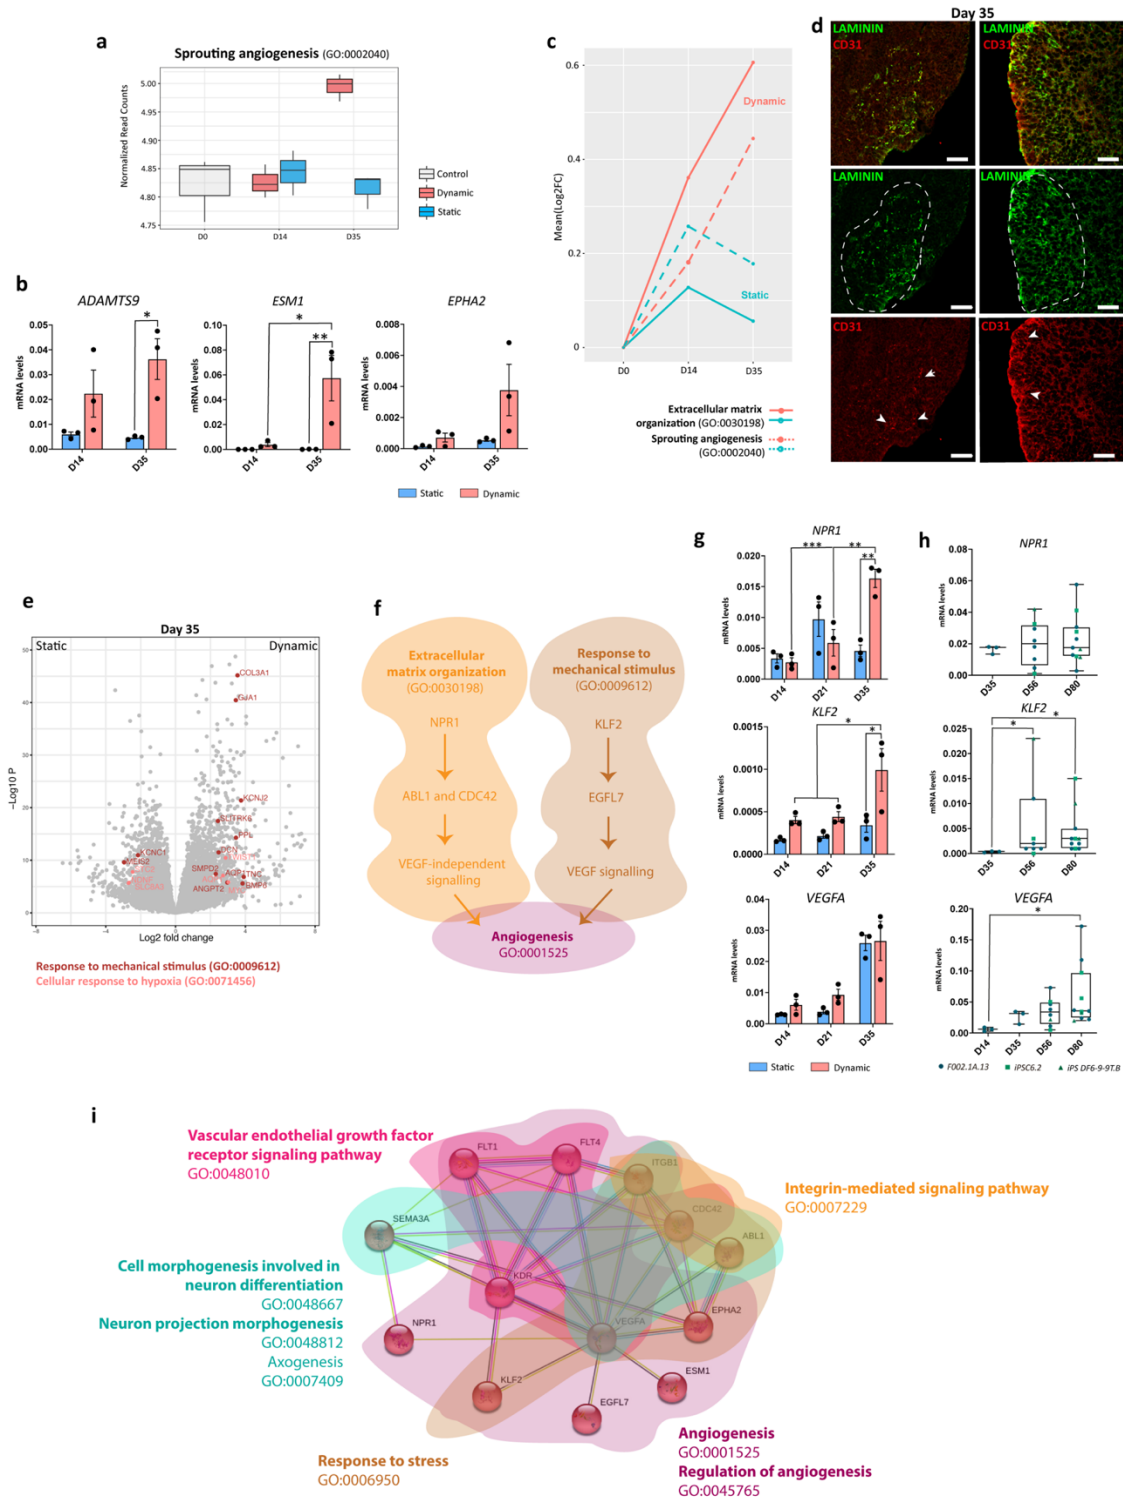

990  
991  
992  
993  
994  
995  
996  
997

**Figure 6. Dynamic condition modulates the expression levels of genes that favor the angiogenesis onset.** **a**, Box-plot representing RNA-seq normalized read counts of representative genes annotated in the sprouting angiogenesis process (GO:0002040, n=125 genes) for control (day 0), dynamic and static conditions at indicated time-points of differentiation. **b**, qRT-PCR analyses of organoids derived from F002.1A.13 iPSC line for genes involved in angiogenesis process. Diagrams depict mRNA expression levels ( $2^{-\Delta CT}$ ) relative to GAPDH based on three independent differentiation experiments for each condition. Two-way ANOVA (Tukey's multiple comparisons test), \* $p < 0.05$ , \*\* $p < 0.01$ ; error bars represent SEM. **c**, Line plot representing the expression of representative transcripts annotated in ECM organization (GO:0030198,

998 n=240 genes) and sprouting angiogenesis (GO:0002040 n=125 genes) processes for static and dynamic conditions relative to day 0. **d**,  
999 Immunofluorescence for LAMININ and CD31 on day 35 of dynamic differentiation. Scale bars, 50 $\mu$ m. **e**, Volcano Plot of differentially  
1000 expressed genes between dynamic and static conditions showing significantly down- and up-regulated transcripts in dynamic conditions  
1001 ( $|\text{Log}_2 \text{FC}| > 2$  and adjusted p-value  $< 0.05$ ) related with response to mechanical stimulus (GO:0009612, n=180 genes) and cellular response  
1002 to hypoxia (GO:0071456, n=180 genes) processes. **f**, Schemes illustrating the proposed networks that may be involved in the modulation of  
1003 angiogenic process by either independent or dependent-VEGF signaling pathway. **g**, qRT-PCR analyses of organoids derived from  
1004 F002.1A.13 iPSC line. Diagrams depict mRNA expression levels ( $2^{-\Delta\text{CT}}$ ) relative to GAPDH based on three independent differentiation  
1005 experiments for each condition. Two-way ANOVA (Tukey's multiple comparisons test), \* $p < 0.05$ , \*\* $p < 0.01$ ; error bars represent SEM. **h**,  
1006 qRT-PCR analysis of organoids derived from different human iPSC lines at the indicated time-points. Box-plots diagrams depict mRNA  
1007 expression levels ( $2^{-\Delta\text{CT}}$ ) relative to GAPDH. Each color and shape-coded dot represents data from one differentiation experiment. One-way  
1008 ANOVA (Kruskal-Wallis test), \* $p < 0.05$ ; error bars represent SEM. **i**, Protein-protein interaction network prediction based on protein  
1009 encoding genes involved in angiogenic process. Interaction networks were obtained from STRING database, in which nodes were clustered  
1010 using Markov Cluster Algorithm (MLC) with an inflation parameter = 3. Biological processes (FDR  $< 0.05$ ) annotating the analyzed proteins  
1011 are highlighted.  
1012  
1013  
1014  
1015  
1016  
1017  
1018  
1019  
1020  
1021  
1022  
1023  
1024  
1025  
1026  
1027  
1028  
1029  
1030  
1031  
1032  
1033  
1034  
1035  
1036  
1037  
1038  
1039  
1040

1041

1042

## Supplementary data

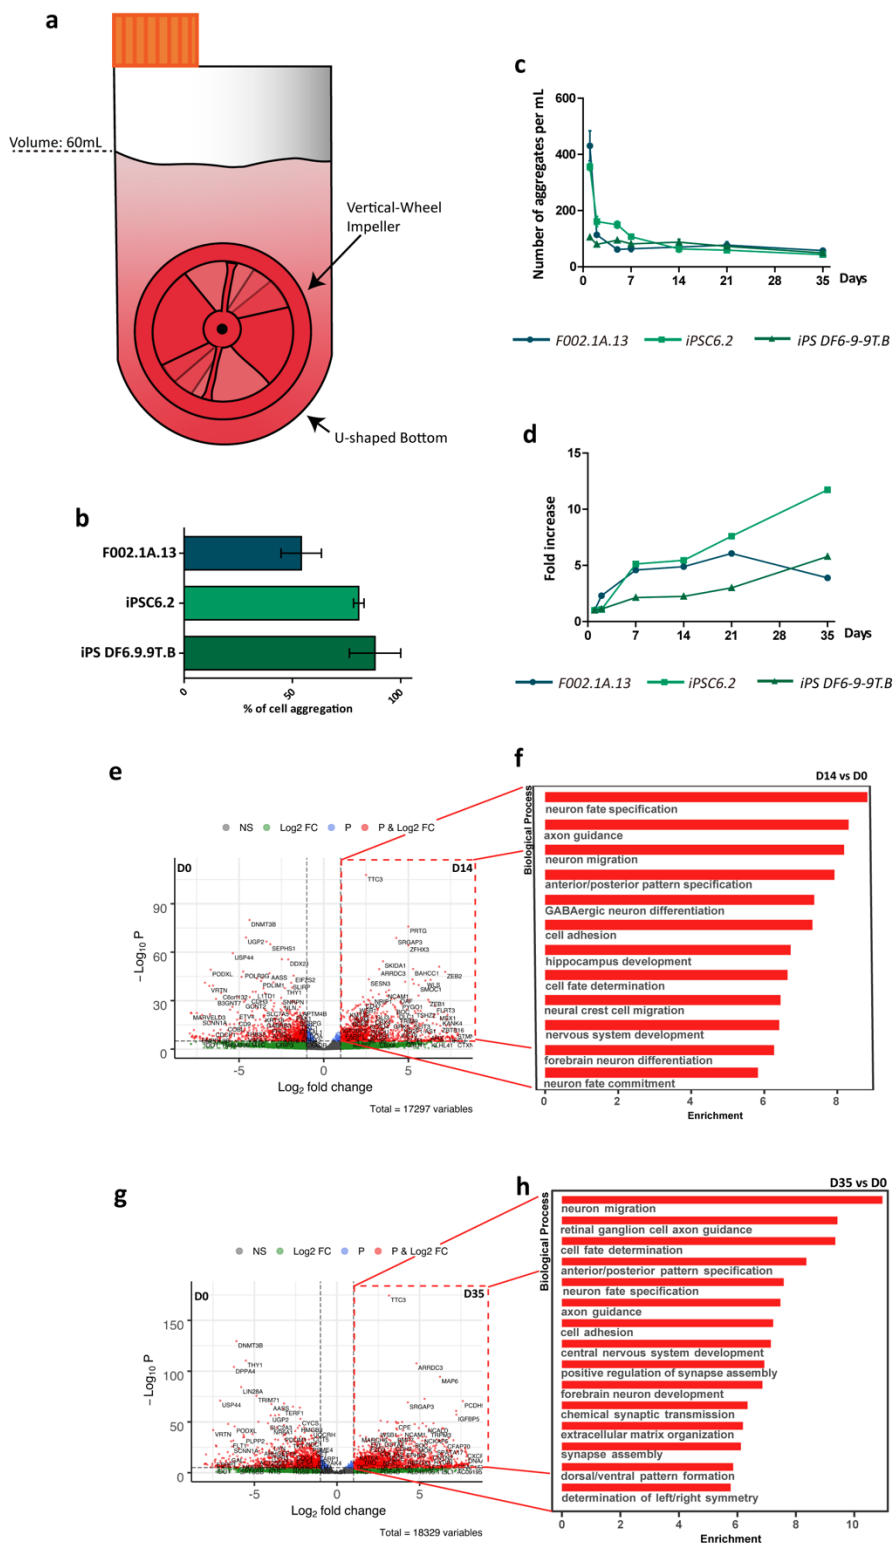

1043

1044

1045

**Supplementary Figure 1. Characterization of human iPSC-derived cerebellar organoids.** **a**, Design of vertical-wheel bioreactor. **b**, Percentage of cell aggregation at 24 hours after single-cell inoculation for different iPSC lines. Each bar includes

1046 data from 4, 3, and 2 independent differentiation experiments using F002.1A.13, iPSC6.2 and iPS DF6.9.9T.B cell line,  
 1047 respectively. Data are represented as mean  $\pm$  SEM. **c**, Number of iPSC-derived aggregates from day 1 to day 35 of cerebellar  
 1048 differentiation for each human iPSC line. **d**, Total volume of biomass relative to day 1 using different human iPSC lines. **e**,  
 1049 Volcano plot of genes identified after cerebellar differentiation of human iPSC using VWBRs on day 14 and compared with  
 1050 day 0. Significantly enriched genes after 14 days of differentiation are labeled. **f**, Top gene ontology (GO) biological processes  
 1051 terms identified for the differentially up-regulated genes ( $\text{Log}_2 \text{FC} > 2$  and adjusted  $p\text{-value} < 0.05$ ) of day 14 versus day 0 of  
 1052 differentiation. **g**, Volcano plot of genes identified after cerebellar differentiation of human iPSC using VWBRs on day 35 and  
 1053 compared with day 0. Significantly enriched genes after 35 days of differentiation are labeled. **h**, Top gene ontology (GO)  
 1054 biological processes terms identified for the differentially up-regulated genes ( $\text{Log}_2 \text{FC} > 2$  and adjusted  $p\text{-value} < 0.05$ ) of  
 1055 day 35 versus day 0 of differentiation.

1056  
 1057  
 1058  
 1059  
 1060  
 1061  
 1062

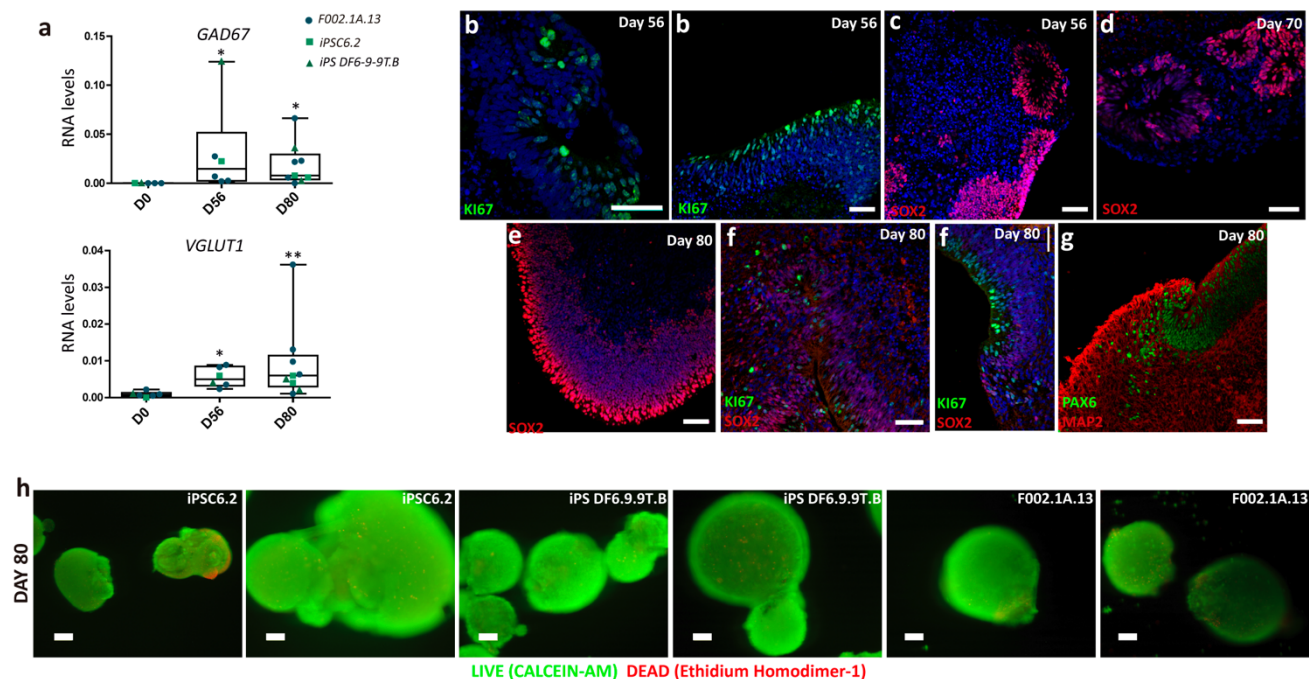

1063  
 1064  
 1065 **Supplementary Figure 2. Assessment of maturation and viability in cerebellar organoids.** **a**, qRT-PCR analyses of  
 1066 aggregates derived from different iPSC lines at the indicated time-points. Box-plots diagrams depict mRNA expression levels  
 1067 ( $2^{-\Delta\text{CT}}$ ) relative to GAPDH. Each color and shape-coded dot represents data from one experiment. One-way ANOVA (Kruskal-  
 1068 Wallis test), \* $p < 0.05$ , \*\* $p < 0.01$ ; error bars represent SEM. **b-f**, Immunofluorescence for KI67, SOX2, PAX6 and MAP2 on  
 1069 indicated time-points of differentiation. Scale bars, 50  $\mu\text{m}$ . **h**, LIVE/DEAD assay for cerebellar organoids derived from distinct  
 1070 human iPSC lines on day 80 of differentiation. Scale bars, 100  $\mu\text{m}$ .

1071  
 1072  
 1073  
 1074  
 1075  
 1076

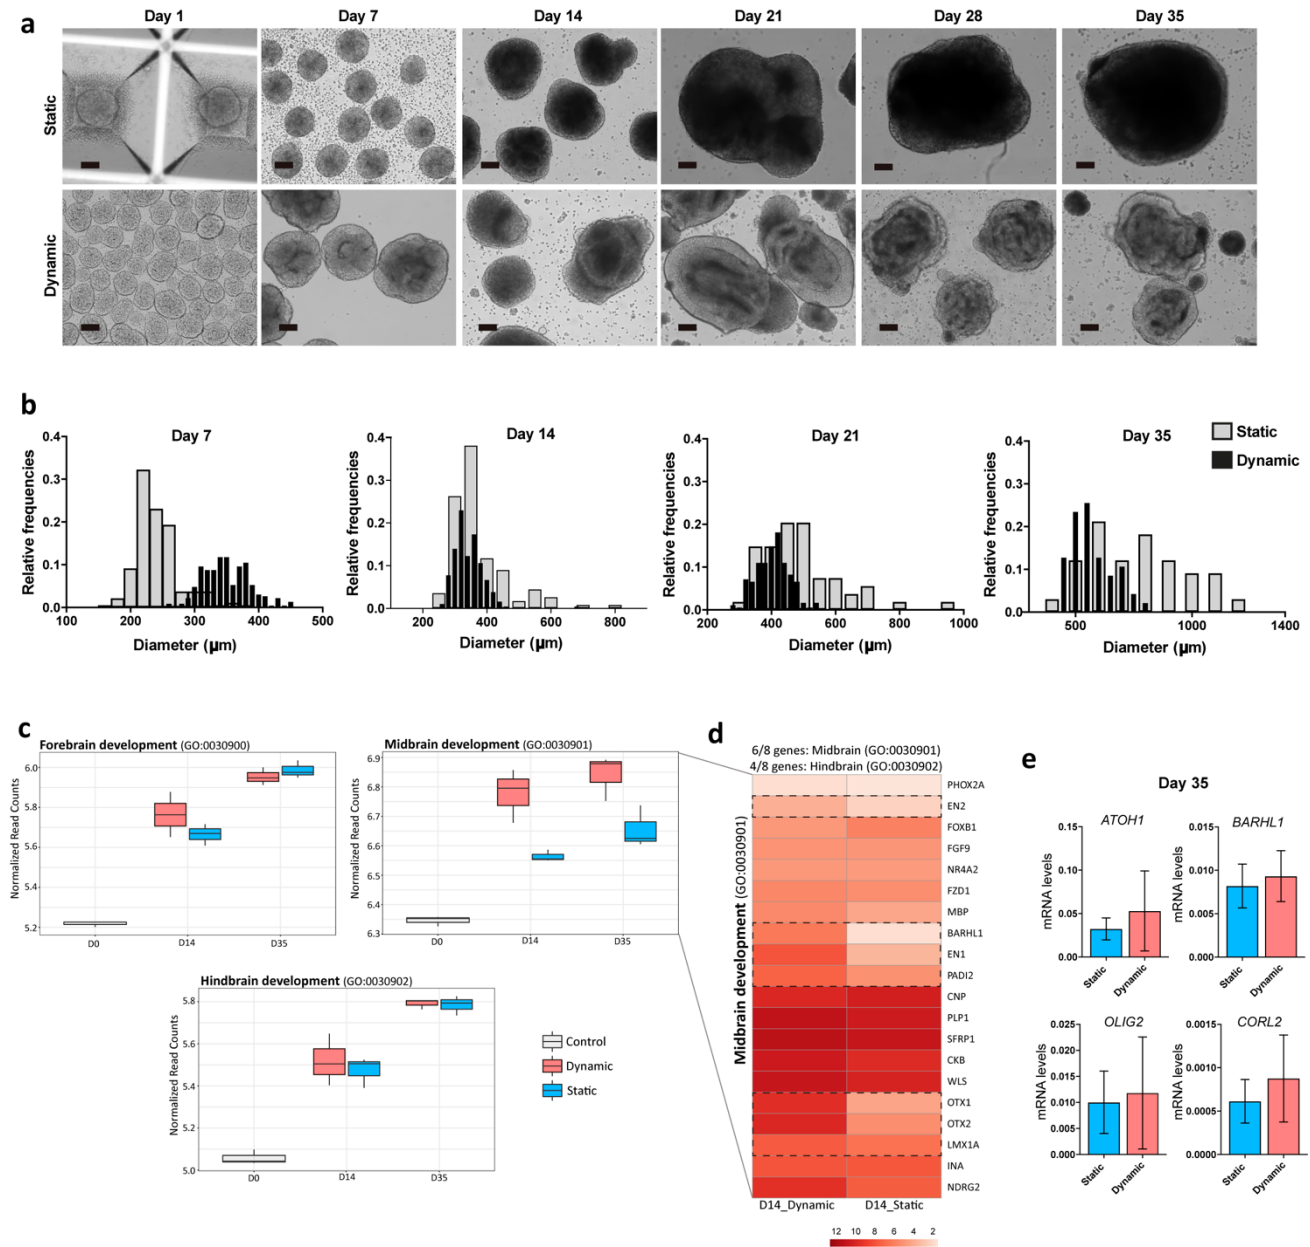

**Supplementary Figure 3. Comparison of dynamic culturing conditions effects on cerebellar differentiation. a,** Representative brightfield photomicrographs showing human iPSC-derived aggregates during cerebellar differentiation in static and dynamic conditions. Scale bar, 100  $\mu\text{m}$ . **b,** Distribution of aggregate diameters along the differentiation protocol in static and dynamic conditions. **c,** Box-plots summarizing RNA-seq normalized read counts of transcripts annotated in the selected GO terms (forebrain, midbrain and hindbrain development) for control (day 0), dynamic and static conditions at indicated time-points of differentiation. **d,** Heat map highlighting the top 20 differentially expressed genes related with midbrain development (GO:0030901) for dynamic and static conditions at day 14 of differentiation. **e,** qRT-PCR analysis of *ATOH1*, *BARHL1*, *OLIG2*, *CORL2* mRNA levels relative to *GAPDH* ( $2^{-\Delta\text{CT}}$ ). Data based on five independent differentiation experiments for each condition using F002.1A.13 iPSC line. Mann-Whitney test; error bars represent SEM.

1077  
1078  
1079  
1080  
1081  
1082  
1083  
1084  
1085  
1086  
1087  
1088  
1089  
1090  
1091  
1092

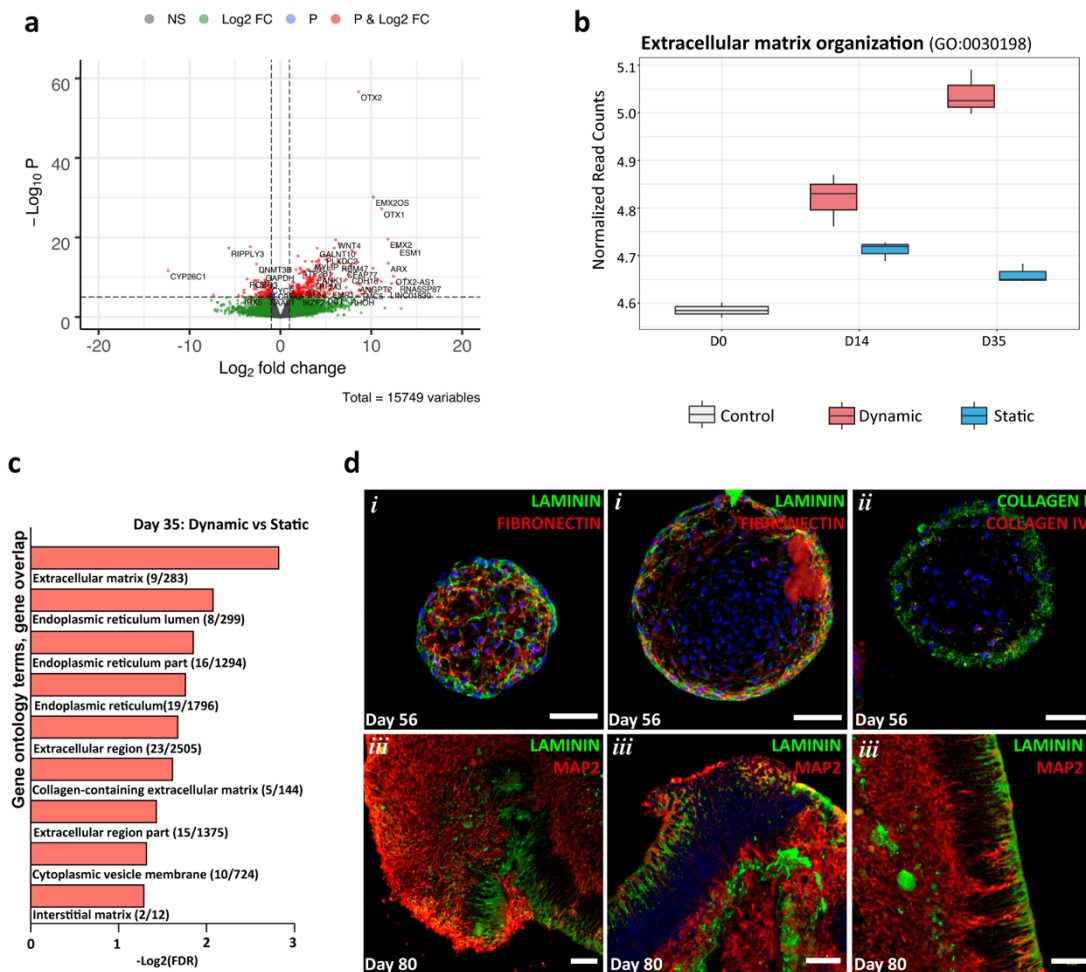

**Supplementary Figure 4. Comparison of effects of dynamic culturing conditions in Extracellular matrix (ECM) remodeling.** **a**, Volcano plot of genes identified during cerebellar differentiation of human iPSC using dynamic and static conditions. **b**, Box-plot representing RNA-seq normalized read counts of transcripts annotated in the ECM organization for control (day 0), dynamic and static conditions at indicated time-points of differentiation. **c**, Top gene ontology (GO) cellular component terms identified for the differentially up-regulated genes ( $\text{Log}_2 \text{FC} > 2$  and adjusted  $p\text{-value} < 0.05$ ) of dynamic versus static conditions at day 35. **d**, Immunofluorescence staining for different markers of ECM components and MAP2 on days 56 and 80 of differentiation. Scale bars,  $50\mu\text{m}$ .

1093  
1094  
1095  
1096  
1097  
1098  
1099  
1100  
1101  
1102  
1103  
1104  
1105  
1106  
1107  
1108



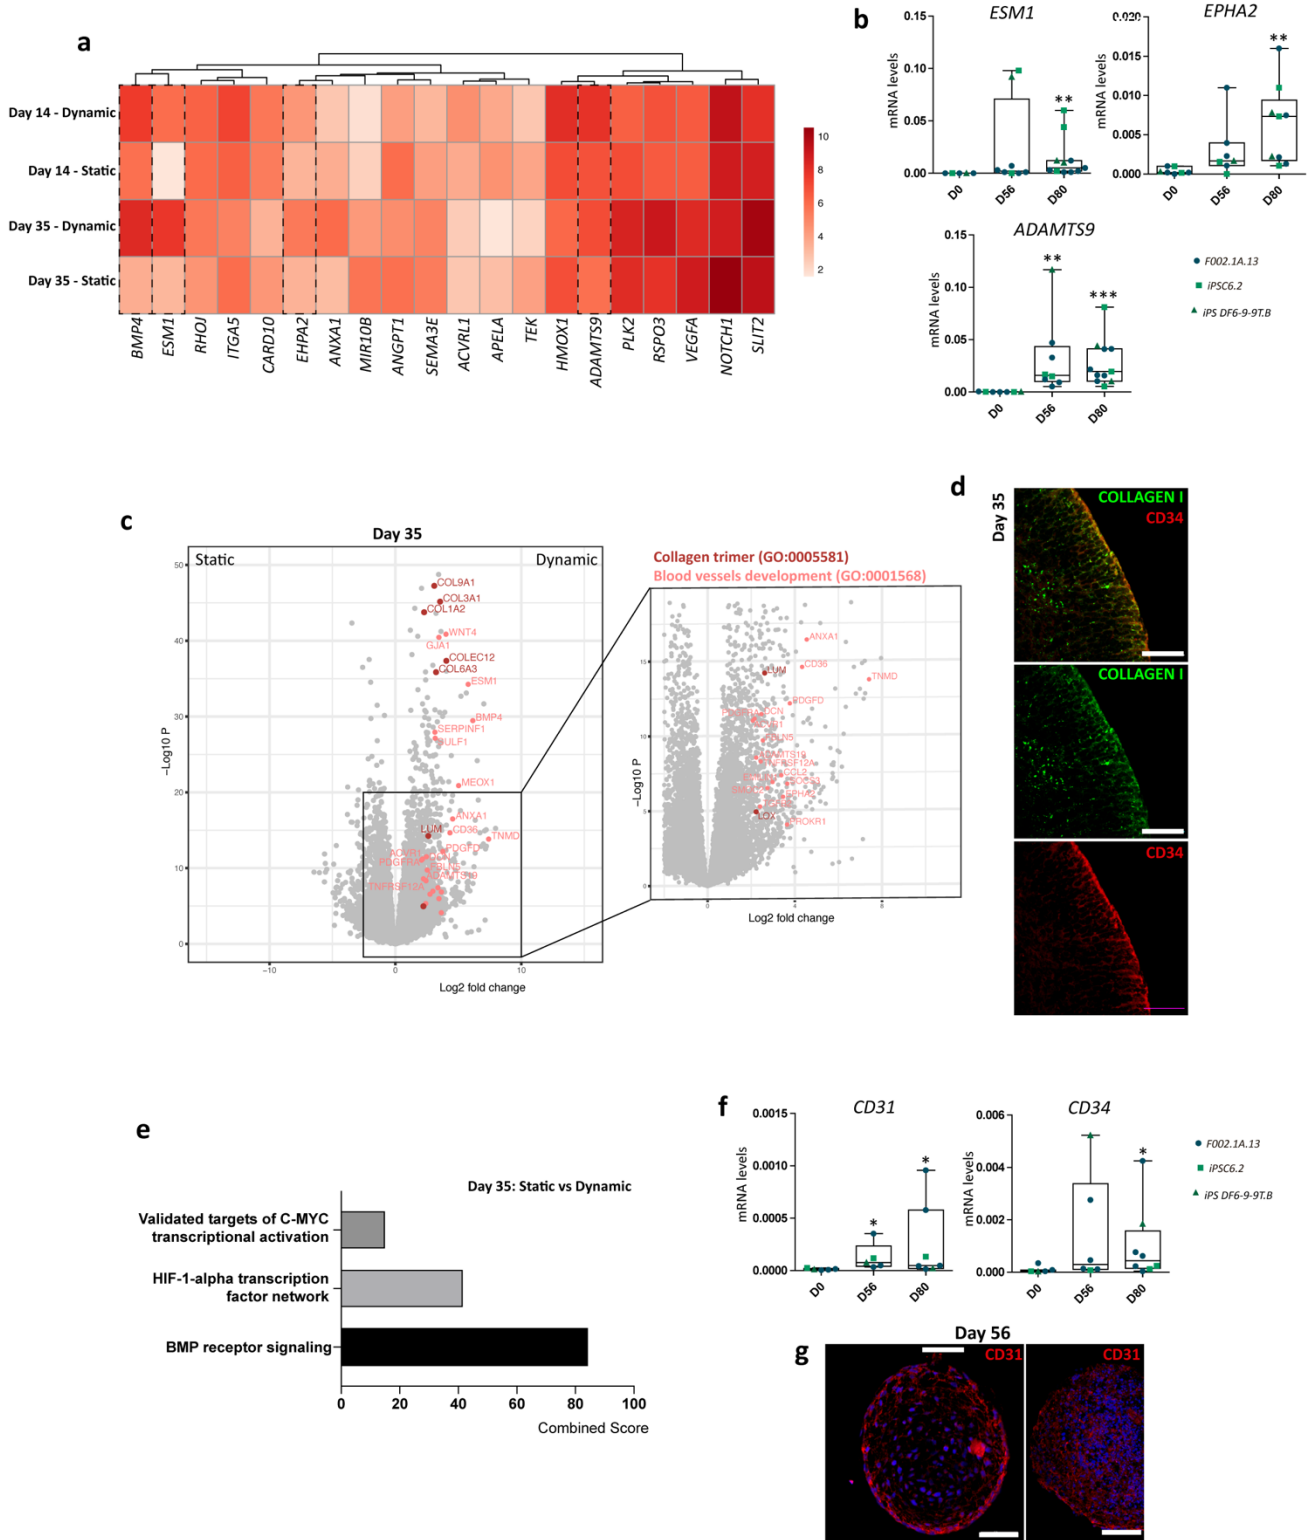

1109

1110

1111

1112

1113

1114

**Supplementary Figure 5. Comparison of effects of dynamic culturing conditions in angiogenesis processes.** **a**, Heat map highlighting the top 20 differentially expressed genes related with the sprouting angiogenesis process (GO:0002040) for dynamic and static conditions at days 14 and 35 of differentiation. **b**, qRT-PCR analyses of aggregates derived from F002.1A.13 iPSC line for genes involved in the sprouting angiogenesis process. Diagrams depict mRNA expression levels ( $2^{-\Delta CT}$ ) relative to GAPDH based on three independent differentiation experiments for each condition. One-way ANOVA (Kruskal-Wallis

test), \* $p < 0.05$ , \*\* $p < 0.01$ , \*\*\* $p < 0.001$ ; error bars represent SEM. **c**, Volcano Plot of differentially expressed genes between dynamic and static conditions showing significantly up-regulated transcripts in dynamic conditions ( $\text{Log}_2 \text{FC} > 2$  and adjusted  $p\text{-value} < 0.05$ ) related with collagen trimer (GO:0005581) and blood vessels development (GO:0001568) processes. **d**, Immunostaining analyses for COLLAGEN I and CD34 at day 35 in dynamic conditions. Scale bars, 50 $\mu\text{m}$ . **e**, NCI-Nature pathways identified for the top 100 genes differentially down-regulated genes ( $\text{Log}_2 \text{FC} > 2$  and adjusted  $p\text{-value} < 0.05$ ) of dynamic versus static condition at day 35. **f**, qRT-PCR analyses of aggregates derived from F002.1A.13 iPSC line for *CD31* and *CD34*. Diagrams depict mRNA expression levels ( $2^{-\Delta\text{CT}}$ ) relative to GAPDH based on three independent differentiation experiments for each condition. One-way ANOVA (Kruskal-Wallis test), \* $p < 0.05$ ; error bars represent SEM. **f**, Immunostaining analyses for CD31 at day 56 in dynamic conditions. Scale bars, 50 $\mu\text{m}$ .

**Table 1. Primers used for qRT-PCR**

| Gene           | Foward                    | Reverse                |
|----------------|---------------------------|------------------------|
| <i>ADAMTS9</i> | ACGAAAACCTTGTTCACACC      | GCTGCAAAAACCATCATCAA   |
| <i>ALDOC</i>   | ACTCCATACCACAGCCCTTG      | GCAATTTCTTCTGCCCTCAG   |
| <i>ATOH1</i>   | TGTTATCCCGTCGTTCAACAAC    | TGGGCGTTTGTAGCAGCTC    |
| <i>BARHL1</i>  | GAGCGGCAGAAGTACCTGAG      | GTAGAAATAAGGCGACGGGAAC |
| <i>CBLN1</i>   | TTTGATTCAGAACGCAGCAC      | TTGGATTAGGACTCCGTTGC   |
| <i>CD31</i>    | GCTGACCCTTCTGCTCTGTT      | TGAGAGGTGGTGCTGACATC   |
| <i>CD34</i>    | CCTAAGTGACATCAAGGCAGAA    | GCAAGGAGCAGGGAGCATA    |
| <i>CORL2</i>   | CCAGGTGTTAAAAGGAAACACA    | GCTCCCTTTTCATCTGATCCT  |
| <i>EN2</i>     | CCGGCGTGGGTCTACTGTA       | GGCCGCTTGTCTCTTTGTT    |
| <i>EPHA2</i>   | CATCTCTCATCCTTTTGGATAAGTT | TCGGTTTGAATCATCTGCAA   |
| <i>ESM1</i>    | AAATGGTTAAATCCACGCTGA     | ATCCACCATGCATCACATTT   |
| <i>GAD67</i>   | CCTGGAACCTGGCTGAATACC     | CCCTGAGGCTTTGTGAATA    |
| GAPDH          | GAGTCAACGGATTTGGTCGT      | TTGATTTTGGAGGGATCTCG   |
| <i>FGF8</i>    | GAGCCTGGTGACGGATCAG       | CGTTGCTCTTGGCGATCAG    |
| <i>GBX2</i>    | GACGAGTCAAAGGTGGAAGAC     | GATTGTCATCCGAGCTGTAGTC |
| <i>GRID2</i>   | AGCTCTTCCTCTCTTGGTTTCC    | GCCCCACGTTGCCTAGAAAT   |
| <i>KIRREL2</i> | GGGGCTAGTTCAGTGGACTAA     | CACGGGCCTAATGTGGAGG    |
| <i>KLF2</i>    | CTTTCGCCAGCCCGTGCCGCG     | AAGTCCAGCACGCTGTTGAGG  |
| <i>L7/PCP2</i> | ACCAGGAGGGCTTCTTCAAT      | CTGTCACACGTTGGTCATCC   |

|                    |                        |                        |
|--------------------|------------------------|------------------------|
| <i>LHX5</i>        | CAGCAACGCTGTAGCCAATTT  | TCCGGATCCTCATCTTTGTC   |
| <i>NEUROGRANIN</i> | TCAAAGTTCCCGAGGAGAGA   | CTAAAAGGGCACGGACTCAG   |
| <i>NPR1</i>        | GTTGTGTCTTCAGGGCCATT   | AATCCGGGGGACTTTATCAC   |
| <i>OCT4</i>        | GTGGAGGAAGCTGACAACAA   | ATTCTCCAGGTTGCCTCTCA   |
| <i>OLIG2</i>       | GACAAGCTAGGAGGCAGTGG   | CGGCTCTGTCATTTGCTTCTTG |
| <i>OTX2</i>        | AGAGGACGACGTTCACTCG    | TCGGGCAAGTTGATTTTCAGT  |
| <i>PARVALBUMIN</i> | TTCTCCCCAGATGCCAGAGA   | GAGATTGGGTGTTTCAGGGCA  |
| <i>PAX2</i>        | AACGACAGAACCCGACTATGT  | GAGCGAGGAATCCCCAGGA    |
| <i>PAX6</i>        | GAATCAGAGAAGACAGGCCA   | GTGTAGGTATCATAACTCCG   |
| <i>TBR1</i>        | CGTCTGCAGCGAATAAGTGC   | AATGTGGAGGCCGAGACTTG   |
| <i>TBR2</i>        | CACATTGTAGTGGGCAGTGG   | CGCCACCAAAGTGGATGAT    |
| <i>VEGFA</i>       | GGAGGAGGGCAGAATTCATCAC | GGTCTCGATTGGATGGCAGT   |
| <i>VGLUT1</i>      | TACACGGCTCCTTTTTCTGG   | CTGAGGGGATCAGCATGTTT   |

1132  
1133  
1134  
1135  
1136  
1137  
1138

**Table 2. List of primary antibodies and dilutions used for immunostaining**

| <b>Antibody</b> | <b>Host species</b> | <b>Company</b>   | <b>Dilution</b> |
|-----------------|---------------------|------------------|-----------------|
| AGGRECAN        | Mouse               | Invitrogen       | 1:200           |
| BARHL1          | Rabbit              | Atlas            | 1:500           |
| CALBINDIN       | Rabbit              | Rabbit           | 1:500           |
| CD31            | Mouse               | DAKO             | 1:100           |
| CD34            | Mouse               | BD Pharmingen    | 1:100           |
| COLLAGEN I      | Rabbit              | Abcam            | 1:200           |
| CORL2           | Rabbit              | Novus Biological | 1:100           |
| EN2             | Mouse               | Sigma            | 1:200           |
| FIBRONECTIN     | Mouse               | Abcam            | 1:1000          |
| GRID2           | Mouse               | Santa Cruz       | 1:100           |
| KI67            | Rabbit              | Abcam            | 1:100           |

|          |        |                 |       |
|----------|--------|-----------------|-------|
| LAMININ  | Rabbit | Abcam           | 1:200 |
| MAP2     | Mouse  | Sigma           | 1:500 |
| NCAD     | Mouse  | BD Transduction | 1:500 |
| NESTIN   | Mouse  | R&D Systems     | 1:400 |
| NRGN     | Rabbit | Millipore       | 1:200 |
| OLIG2    | Rabbit | Millipore       | 1:500 |
| OTX2     | Rabbit | Abcam           | 1:200 |
| PAX2     | Mouse  | Abnova          | 1:400 |
| PAX6     | Rabbit | Covance         | 1:400 |
| PVALB    | Mouse  | Sigma           | 1:200 |
| SOX2     | Mouse  | R&D Systems     | 1:200 |
| SYNAPSIN | Rabbit | Abcam           | 1:200 |
| TBR1     | Rabbit | Millipore       | 1:200 |
| TBR2     | Rabbit | Abcam           | 1:200 |
| TUJ1     | Mouse  | Biologend       | 1:500 |
| VERSICAN | Mouse  | Invitrogen      | 1:100 |
| ZO1      | Rabbit | Novex           | 1:100 |

1139

1140
